1 **ACSS2 Regulates HIF-2 $\alpha$  Degradation through the E3-Ubiquitin Ligase MUL1 in Clear Cell**  
2 **Renal Cell Carcinoma**

3 Zachary A. Bacigalupa<sup>1,2</sup>, Whitney A. Brown<sup>1</sup>, Evan S. Krystofiak<sup>3</sup>, Melissa M. Wolf<sup>1</sup>, Rachel A.  
4 Hongo<sup>1,2</sup>, Madelyn Landis<sup>1,2</sup>, Edith K. Amason<sup>1</sup>, Kathryn E. Beckermann<sup>1</sup>, Jeffrey C. Rathmell<sup>2,4</sup>,  
5 W. Kimryn Rathmell<sup>1,2</sup>

6

7 <sup>1</sup>Department of Medicine, Vanderbilt University Medical Center, Nashville, TN 37232

8 <sup>2</sup>Vanderbilt Center for Immunobiology, Vanderbilt University Medical Center, Nashville, TN  
9 37232

10 <sup>3</sup>Cell Imaging Shared Resource, Vanderbilt University, Nashville, TN 37232

11 <sup>4</sup>Department of Pathology, Microbiology, and Immunology, Vanderbilt University Medical Center,  
12 Nashville, TN 37232

13

14 Running Title: ACSS2-dependent regulation of HIF-2 $\alpha$  in ccRCC

15 Keywords: ACSS2, ccRCC, HIF-2 $\alpha$ , mitochondria, stability

16

17 Address Correspondence to:

18 W. Kimryn Rathmell, M.D., Ph.D.

19 1161 21st Avenue South, Suite D-3100 Medical Center North

20 Nashville, TN 37232

21 Phone: 615-343-8701, Fax: 615-343-2551

22 Email: [Kimryn.Rathmell@VUMC.org](mailto:Kimryn.Rathmell@VUMC.org)

23

1 **ABSTRACT**

2 Clear cell renal cell carcinoma (ccRCC) is an aggressive kidney cancer driven by *VHL* loss and  
3 aberrant HIF-2 $\alpha$  signaling. Acetate metabolism may contribute to this axis by ACSS2-dependent  
4 acetylation of HIF-2 $\alpha$  and may provide opportunities to intervention. Here we tested the effects  
5 of pharmacological and genetic manipulation of ACSS2 on HIF-2 $\alpha$ , ccRCC cells, and tumors.  
6 ACSS2 inhibition led to HIF-2 $\alpha$  degradation and suppressed ccRCC growth *in vitro*, *in vivo*, and  
7 in primary cell cultures of ccRCC patient tumors. This treatment resulted in reduced glucose and  
8 cholesterol metabolism, mitochondrial biogenesis and altered cristae deformation, that are  
9 consistent with loss of HIF-2 $\alpha$ . Mechanistically, HIF-2 $\alpha$  protein levels are regulated through  
10 proteolytic degradation and we found, in parallel to *VHL*, HIF-2 $\alpha$  stability was dependent on  
11 ACSS2 activity to prevent direct interaction with the E3 ligase MUL1. These findings highlight  
12 ACSS2 as a critical upstream regulator of HIF-2 $\alpha$  that may be exploited to overcome resistance  
13 to HIF-2 $\alpha$  inhibitor therapies.

14

1    **STATEMENT OF SIGNIFICANCE**

2    We have unveiled ACSS2 as a critical upstream regulator of HIF-2 $\alpha$  in ccRCC. Targeting  
3    ACSS2 potently promotes HIF-2 $\alpha$  degradation via MUL1 to effectively deplete mitochondrial  
4    activity and block ccRCC primary tumor models and growth models resistant to HIF-2 $\alpha$  inhibitor  
5    therapy.

6

## 1 INTRODUCTION

2 Renal cell carcinoma (RCC) was diagnosed in 76,000 individuals in 2020 in the United  
3 States [1]. Clear cell renal cell carcinoma (ccRCC) is the most abundant and aggressive  
4 subtype of RCC, accounting for 75% of all RCC cases [2]. ccRCC has been intimately linked to  
5 the hereditary condition von Hippel-Lindau (VHL) disease, where patients harbor an inactivating  
6 mutation to the *VHL* tumor suppressor gene. In addition to familial associations, 90-95% of  
7 ccRCC cases are sporadically derived and the vast majority, upwards of 90%, present with a  
8 somatic mutation or suppressive hypermethylation of the promoter to the *VHL* gene [3-8]. The  
9 *VHL* gene encodes the E3 ubiquitin ligase pVHL, which functions to regulate the hypoxia  
10 inducible factor (HIF) family of transcription factors. Under normal oxygen conditions, prolyl  
11 hydroxylases (PHDs) add hydroxyl groups to proline residues on HIF- $\alpha$  proteins, which are then  
12 recognized by pVHL and targeted for proteasomal degradation [9]. Hypoxia, or the absence of  
13 pVHL, allows HIF- $\alpha$  proteins to accumulate, enter the nucleus and dimerize with HIF-1 $\beta$ /ARNT,  
14 and direct a major transcriptional response [10]. In ccRCC, HIF-2 $\alpha$  is the major driver of  
15 transformation in part due to the loss of the 14q chromosomal arm where the HIF1A locus  
16 resides [11, 12]. Indeed, HIF-2 $\alpha$  has been shown to directly regulate pathways such as lipid and  
17 cholesterol metabolism that fuel the clear cell phenotype [13-17]. Clinically, this has led to the  
18 development of small molecule inhibitors targeting HIF-2 $\alpha$  interaction with the essential binding  
19 partner HIF-1 $\beta$  and HIF-2 $\alpha$  transcriptional activity [18-21]. Belzutifan (MK-6482, previously PT-  
20 2399) is the first of such molecules to have received FDA approval for the treatment of adult  
21 patients with VHL disease who need therapy for ccRCC and other hemangioblastomas [22].

22 pVHL-mediated degradation of HIF- $\alpha$  proteins remains the most well understood  
23 mechanism of HIF- $\alpha$  disposal. However, VHL-independent degradation pathways have been  
24 identified, one involving JNK1-mediated stability of the chaperone proteins Hsp90/Hsp70, and  
25 another describes an endoplasmic reticulum (ER) stress-directed GSK3 $\beta$ -FBXW1A degradation

1 axis [23]. More recently, the mitochondrial-tethered E3 ubiquitin ligase, MUL1, was found to  
2 indirectly promote HIF-1 $\alpha$  degradation by targeting the HIF-1 $\alpha$  degradation complex UBXN7 for  
3 proteasomal destruction [24]. Though MUL1 is best described to target proteins for degradation  
4 via SUMOylation, and K48 or K63 polyubiquitination, it can also aid mitophagy and autophagic  
5 degradation of mitochondrial associated proteins [25]. Localized to the outer mitochondrial  
6 membrane, MUL1 activity is integrated into mitochondrial quality control processes by modifying  
7 proteins such as DRP1 and Mitofusin 1, regulating the function and morphology of mitochondria  
8 [26, 27]. A role for MUL1 to regulate HIF-2 $\alpha$  remains uncertain.

9 Targeting HIF-2 $\alpha$  transcriptional activity has proven to be an effective treatment in VHL  
10 syndromic tumors, however, development of resistance makes parallel therapeutic strategies  
11 essential [28]. Resistance to belzutifan may be caused by HIF-2 $\alpha$  mutations or the high levels  
12 of HIF-2 $\alpha$  that can accumulate in the absence of pVHL and exceed local drug concentration.  
13 HIF-2 $\alpha$  acetylation may provide an alternate approach to overcome resistance. Several studies  
14 have described the post-translational addition of an acetyl group to lysines on HIF-2 $\alpha$  that  
15 supported protein stability and enhanced downstream signaling [29-32]. In these studies, the  
16 acetylation of HIF-2 $\alpha$ , particularly during stress conditions, required the activity of acetyl-CoA  
17 synthetase 2 (ACSS2) [29-31]. ACSS2 is a metabolic enzyme present in both the cytoplasm  
18 and nucleus, which converts acetate into acetyl-CoA in an ATP-dependent reaction. In pre-  
19 clinical cancer models, ACSS2 has proven to be a promising target and has led to the rapid  
20 development of novel small molecule inhibitors [33-38]. ACSS2 has been found to facilitate  
21 epigenetic changes enhancing lysosomal biogenesis and autophagic activity in other biological  
22 models [39], which coupled with its reported interaction with physiologically expressed HIF-2 $\alpha$   
23 make ACSS2 a promising target in the context of ccRCC.

24 Here we investigate the relationship between ACSS2 activity and constitutive HIF-2 $\alpha$   
25 protein stability in the context of cancer models driven by *VHL* loss. We found that inhibition of

1 ACSS2 resulted in transcriptional downregulation of genes involved in HIF-2 $\alpha$  signaling, as well  
2 as cholesterol biosynthesis and glucose uptake. In addition, we found that ACSS2 inhibition  
3 induced HIF-2 $\alpha$  proteasomal degradation even in the absence of pVHL. Mechanistically, ACSS2  
4 inhibition or silencing stimulated the expression of MUL1, which formed a direct complex with  
5 HIF-2 $\alpha$  to provide a potential VHL-independent and HIF2- $\alpha$ -specific mechanism to disrupt HIF-  
6 dependent transcription. Electron microscopy revealed ACSS2 inhibition, as well as HIF-2 $\alpha$   
7 silencing, caused massive mitochondrial deformation likely to result in catastrophic loss of  
8 function. Importantly, pharmacological inhibition of ACSS2 effectively blocked cancer cell growth  
9 in clinical samples and the HIF-2 $\alpha$  inhibitor resistant 769-P cell line. Together, these findings  
10 demonstrate a critical role for ACSS2 to support ccRCC growth by interfering with direct  
11 regulation of HIF-2 $\alpha$  stability by MUL1 to maintain the activity of key metabolic pathways.  
12 ACSS2 is, therefore, a novel therapeutic target for HIF-2 $\alpha$  driven ccRCC.

13

## 14 **RESULTS**

### 15 **ACSS2 is essential for ccRCC growth and proliferation.**

16 ACSS2 has remained largely unexplored as a potential therapeutic target in ccRCC. To  
17 examine the role of ACSS2 in ccRCC, we first performed a dose response, time course study  
18 with a pharmacological inhibitor of ACSS2 in HKC (normal kidney epithelia), 786-O (*VHL*<sup>-/-</sup>  
19 ccRCC), and A498 (*VHL*<sup>-/-</sup> ccRCC) cell lines. HKC cells were affected only at the highest dose,  
20 but ACSS2 inhibition led to a significant reduction in cell growth for the ccRCC cell lines (Figure  
21 1A and 1B, Supplemental Figure 1A). We next analyzed the effect of ACSS2 inhibition on  
22 proliferation by measuring BrdU incorporation. Similarly, while HKC cells were only significantly  
23 affected after 48 hours of 5  $\mu$ M and 10  $\mu$ M doses, proliferation was significantly reduced in  
24 ccRCC cell lines at 24-hours with all doses of the inhibitor, (Figure 1C and 1D, Supplemental

1 Figure 1B). Tumor sphere formation assays also revealed a striking difference in the ability of  
2 786-O cells to form spheres when treated with ACSS2i (Supplemental Figure 1C). To assess  
3 the impact of ACSS2 on ccRCC growth more directly, we transduced the 786-O cell line to  
4 stably express a doxycycline-inducible shRNA construct targeting a control sequence or  
5 ACSS2. After 48 hours, we assessed cell growth via crystal violet staining and observed  
6 significant reduction in cell growth resulting from ACSS2 depletion (Figure 1E). Like the  
7 inhibitor, after 24 hours, 786-O cells expressing shACSS2 displayed significantly reduced BrdU  
8 incorporation (Figure 1F).

9           With our data confirming ACSS2 is required for ccRCC growth in vitro and that ccRCC  
10 cell lines are more sensitive to ACSS2 inhibition, we next investigated the ability of ACSS2  
11 inhibition to block tumor growth in vivo. Doxycycline induction of shACSS2 in mice bearing  
12 subcutaneous 786-O tumors resulted in a significant reduction in tumor growth (Figure 1G) and  
13 final tumor weight (Figure 1H). Similarly, mice bearing subcutaneous 786-O tumors receiving  
14 daily treatment with 15 mg/kg ACSS2i exhibited a remarkable decrease in tumor growth and  
15 final tumor weight (Figure 1I and 1J). In neither model did targeting ACSS2 result in any  
16 observable toxicity such as weight loss (Supplemental Figure 1D and 1E).  
17 Immunohistochemistry staining for CD31 and Periodic Acid Schiff revealed that targeting  
18 ACSS2 also reduced vascularization and glycogen deposition (Figure 1K-L and Supplemental  
19 Figure 1F-G), which are commonly associated clinical features of ccRCC linked to HIF  
20 signaling. Together, these data identify ACSS2 as a key contributor to tumor growth and a  
21 druggable vulnerability in ccRCC.

22

23 **HIF-2 $\alpha$  gene and protein expression is regulated by ACSS2 activity.**

1           In ccRCC, aberrant HIF-2 $\alpha$  signaling configures widespread signaling and metabolic  
2 changes. We hypothesized that these effects would be tied to the VHL-HIF axis. To test the role  
3 of ACSS2 to regulate essential metabolic signaling pathways in ccRCC, we performed  
4 transcriptomic analysis using the NanoString Metabolic Pathways probe set on 786-O cells  
5 transduced with shRNA targeting a control sequence or shACSS2 (Figure 2A). Intriguingly,  
6 differential expression analysis of this dataset identified a HIF-2 $\alpha$  RCC Signaling gene set  
7 consisting of *EGLN3*, *EPAS1*, *PDGFB*, *SLC2A1*, and *VEGFA* as the most significantly  
8 downregulated pathway in response to ACSS2 deficiency (Figure 2B), suggesting that HIF-2 $\alpha$   
9 transcriptional activation was disrupted. To confirm these findings, we performed qRT-PCR on  
10 786-O cells treated with 5  $\mu$ M of ACSS2i for 24 hours (Supplemental Figure 2A) or transduced  
11 with shHIF2A (Supplemental Figure 2B) and observed a significant reduction in *Epas1* gene  
12 expression.

13           Because HIF-2 $\alpha$  is largely regulated at the protein level, we hypothesized ACSS2 may  
14 impact HIF-2 $\alpha$  protein. Consistent with this model, we observed a robust decrease in HIF-2 $\alpha$   
15 protein in 786-O cells transduced with shACSS2 (Figure 2C). HIF-2 $\alpha$  protein expression was  
16 also suppressed by pharmacologic ACSS2 inhibition to result in reduced expression of known  
17 HIF-2 $\alpha$  targets (Figure 2D). Notably, HIF-2 $\alpha$  protein expression was not impacted by ACSS2  
18 inhibition in the HKC cell line (Supplemental 2C). To further test the involvement of ACSS2  
19 activity for the observed changes, we stably overexpressed ACSS2 in 786-O cells and  
20 assessed protein expression, where we observed an increase in the expression of HIF-2 $\alpha$  and  
21 its downstream signaling network (Figure 2E). Additionally, a BrdU proliferation assay confirmed  
22 that overexpression of ACSS2 in 786-O cells also resulted in enhanced proliferation (Figure 2F).  
23 Next, we tested whether overexpressing ACSS2 was sufficient to enhance tumorigenic potential  
24 and determine if any observed effect was dependent on HIF-2 $\alpha$  utilizing an anchorage-  
25 independent growth assay. 786-O cells were transduced to express V5-ACSS2 or the empty



1 vector followed by a second transduction to target HIF2A with shRNA (Supplemental Figure  
2 2D). After 21 days of growth, it was determined that ACSS2 overexpression increased the size  
3 and number of colonies, but this increase was fully mitigated when *HIF2A* was targeted with  
4 shRNA (Figure 2G).

5

## 6 **ACSS2 activity mediates HIF-2 $\alpha$ stability**

7 Previous studies have identified acetylated lysine residues on HIF-2 $\alpha$ , which confer  
8 protein stability and yield optimal signaling, that are acquired from acetyl-CoA produced from  
9 ACSS2 [29-32]. To better understand the mechanism by which ACSS2 may regulate HIF-2 $\alpha$   
10 protein expression, we performed a 1-hour incubation with the proteasomal inhibitor MG132  
11 followed by the addition of DMSO or 5  $\mu$ M ACSS2i for 24 hours. Interestingly, 786-O cells  
12 receiving the MG132 pre-treatment prior to ACSS2i displayed a significant rescue in HIF-2 $\alpha$   
13 expression (Figure 3A and Supplemental 3A) suggesting ACSS2 inhibition enhances HIF-2 $\alpha$   
14 proteasomal degradation, even in *VHL* deficient 786-O cells.

15 Recently, several studies have linked the E3 ubiquitin ligase, MUL1, to the indirect  
16 regulation of HIF-1 $\alpha$  degradation by the E3-ligase co-factor UBXN7 [24]. Consistent with a  
17 potential role for MUL1, analysis of TCGA and CPTAC samples via the UALCAN database  
18 show that MUL1 transcript abundance and protein expression are significantly reduced when  
19 compared to normal adjacent tissue (Supplemental Figure 3B and 3C). Survival analysis  
20 performed on the KIRC dataset assessing the effect of MUL1 expression on patient outcome  
21 identified a correlation between low MUL1 expression and reduced survival (Figure 3B).  
22 Intriguingly, depleting MUL1 via shRNA provided 786-O cells with resistance to treatment with  
23 ACSS2i or PT-2385, enabling successful anchorage-independent growth (Figure 3C and  
24 Supplemental Figure 3D). Considering these findings, we next analyzed the effect of targeting

1 ACSS2 on MUL1 expression. Pharmacologically or genetically targeting ACSS2 in 786-O cells  
2 increased MUL1 expression (Figure 3D and 3E). In the HKC cell line, we also observed an  
3 increase in MUL1 expression in response to ACSS2 inhibition despite having no impact on HIF-  
4 2 $\alpha$  expression, which was possibly due to continued expression of pVHL (Supplemental Figure  
5 3E). To test whether MUL1 could interact with and direct the degradation of HIF-2 $\alpha$ , we  
6 immunoprecipitated MUL1 from 786-O cells treated with DMSO or 5  $\mu$ M ACSS2i for 24 hours  
7 and observed HIF-2 $\alpha$  and MUL1 to interact in a complex (Figure 3F). These results show that  
8 ACSS2 is a critical and direct mediator of MUL1-directed HIF-2 $\alpha$  protein degradation. Moreover,  
9 these findings highlight ACSS2 and MUL1 as means to target HIF-2 $\alpha$  in ccRCC.

10

### 11 **ACSS2 activity supports glucose and cholesterol metabolism.**

12 The link between hypoxia signaling and metabolism has been well-characterized and  
13 aberrant HIF-2 $\alpha$  signaling has been shown to promote glucose and cholesterol metabolism in  
14 ccRCC. To address the impact of ACSS2 on metabolic pathways, we performed a  
15 transcriptomic analysis. Differential gene expression analysis of 786-O cells treated with DMSO  
16 or 5  $\mu$ M ACSS2i for 24 hours identified cholesterol metabolism as the most significantly altered  
17 pathway (Figure 4A). Notable changes within the cholesterol metabolism pathway  
18 corresponding to ACSS2 inhibition included the decrease in HMG-CoA synthase (HMGCS1),  
19 which synthesizes HMG-CoA from acetyl-CoA, HMG-CoA reductase (HMGCR), whose catalytic  
20 activity produces mevalonate in the rate-limiting step of cholesterol synthesis, and 7-  
21 dehydrocholesterol reductase (DHCR7) and 24-dehydrocholesterol reductase (DHCR24) which  
22 perform the final reaction in cholesterol biosynthesis (Supplemental Figure 4A). Functionally, we  
23 measured total cholesterol levels in 786-O cells treated with DMSO or 5  $\mu$ M ACSS2i for 24  
24 hours and found a significant reduction in response to ACSS2 inhibition (Figure 4B).

1           Given the link between hypoxia signaling and glucose metabolism, we next investigated  
2 the effect of ACSS2 inhibition on *SLC2A1* (Glut1) and hexokinase II (*HKII*) gene expression. To  
3 this end, we performed RT-PCR on 786-O cells treated with DMSO or 5  $\mu$ M ACSS2i for 24  
4 hours and found the transcripts of *SLC2A1* and *HKII* to be significantly reduced in response to  
5 ACSS2 inhibition (Figure 4C). Next, we tested if the observed mRNA changes correspondingly  
6 altered protein expression. Following 24 hours of treatment with DMSO or ACSS2i, HIF-2 $\alpha$ , as  
7 well as GLUT1, HKII, SREBP-1, and SREBP-2 which are more commonly associated with HIF-  
8 1 $\alpha$  [40, 41], protein levels were all decreased in response to ACSS2 inhibition (Figure 4D).  
9 Conversely, overexpression of ACSS2 in 786-O cells enhanced expression of HIF-2 $\alpha$ , GLUT1,  
10 and HKII (Figure 4E). A time course measurement on glucose present in the media of 786-O  
11 cells treated with DMSO or 5  $\mu$ M ACSS2i revealed a significant increase in glucose present in  
12 the media after 48 hours of ACSS2i treatment, indicating an impaired ability of the cells to  
13 uptake and consume glucose (Supplemental 4B). Additionally, we quantified the acetate  
14 concentrations in the media of 786-O cells following a 24-hour dose response with ACSS2i and  
15 found that ACSS2 inhibition significantly enhanced the amount of acetate present in the media  
16 (Supplemental Figure 4C). Similarly, 786-O cells transduced with the doxycycline-inducible  
17 shRNA system saw an increase in acetate in the media when shACSS2 was induced, whereas  
18 a significant decrease in acetate was observed when ACSS2 was overexpressed  
19 (Supplemental Figure 4D). These results confirm that altering ACSS2 activity directly impacts  
20 acetate consumption. Furthermore, our results demonstrate that ACSS2 activity transcriptionally  
21 regulates the rate-limiting enzymes in cholesterol synthesis and glucose metabolism, which are  
22 likely to have widespread effects on the cell.

23

24   **Targeting ACSS2 elicits cancer cell-specific mitochondrial defects.**

1 Mitochondrial quality is intimately linked to their function and ability to facilitate metabolic  
2 processes [42, 43]. Considering the magnitude by which targeting ACSS2 has shown to inhibit  
3 glucose metabolism and cholesterol biosynthesis, we hypothesized that inhibiting ACSS2 would  
4 selectively disrupt mitochondrial homeostasis in cancer cells. To test the effects on  
5 mitochondrial morphology electron microscopy was performed on HKC and 786-O cells treated  
6 with DMSO for 72 hours or with 5  $\mu$ M ACSS2i for 24, 48, and 72 hours (Figure 5A and 5B).  
7 Strikingly, the mitochondria in 786-O cells treated with ACSS2i began to transform as early as  
8 24 hours from the typically observed elongated morphology as observed in the DMSO control,  
9 to a smaller and spherical morphology, a process not detected in the mitochondria of HKC cells  
10 (Figure 5A and 5B). Additionally, the cristae morphology degenerated from linear and  
11 continuous to fragmented and spherical (Figure 5B). These results were further corroborated  
12 when we looked at the expression of proteins involved in cristae structure such as Opa-1,  
13 Mitofusin 1, Mitofusin 2, and Drp1, after treatment with 5  $\mu$ M ACSS2i for 48 hours result in a  
14 loss of expression specifically in 786-O cells (Supplemental 5A and 5B). We also observed a  
15 cancer cell-specific reduction in the expression of PGC1 $\beta$ , which has been shown to control  
16 mitochondrial biogenesis [44] (Figure 5A and 5B).

17 The impact of ACSS2 inhibition on mitochondrial biogenesis was next tested. Applying a  
18 colorimetric assay that detects both the nuclear encoded mitochondrial gene SDH-A and the  
19 mitochondrial encoded COX-I, we discovered a significant, dose-dependent decrease in COX-I  
20 after 24 hours of ACSS2i treatment in the 786-O cells. This had no impact, however, on the  
21 HKC cells (Supplemental 5C and 5D). To determine if the observed mitochondrial phenotype  
22 was specific to ACSS2, we performed electron microscopy on 786-O cells where shRNA  
23 targeting ACSS2 had been induced with doxycycline for 48 hours and we observed shACSS2  
24 induction had the same morphological changes that pharmacological inhibition produced (Figure  
25 5C). Additionally, shACSS2 had a similar effect on mitochondrial biogenesis (Supplemental

1 Figure 5E). However, the reduced expression of cristae structural proteins observed in response  
2 to ACSS2i was not as robust with shACSS2, although PGC1 $\beta$  induction was lost (Supplemental  
3 Figure 5F). Together, these data suggest that ACSS2 activity serves an integral role to maintain  
4 the quality of mitochondria in *VHL*-mutated cancer cells, possibly through a PGC1 $\beta$ -dependent  
5 mechanism.

6 We next questioned whether mitochondrial maintenance influenced by ACSS2 activity  
7 was dependent on HIF-2 $\alpha$ . To address this question, electron microscopy was performed on  
8 786-O cells overexpressing ACSS2 which had been transduced to express shControl or  
9 shHIF2A. Mitochondria from cells overexpressing ACSS2 had a characteristically normal  
10 appearance displaying an elongated morphology with defined cristae; however, when shHIF2A  
11 was introduced, we observed a return of the small, circular mitochondrial phenotype with  
12 deformed cristae (Figure 5D). Interestingly, treatment with the HIF-2 $\alpha$  inhibitor PT-2385 did not  
13 result in a morphological defect in the mitochondria (Figure 5E), possibly indicating that PT-  
14 2385 has lower efficacy than targeting with shRNA. In sum, these results suggest a role for HIF-  
15 2 $\alpha$  in maintaining healthy mitochondria and provide further insight into the scope of the ACSS2-  
16 HIF-2 $\alpha$  axis.

17

### 18 **ACSS2 inhibition selectively impedes cancer cell growth and HIF-2 $\alpha$ expression in** 19 **ccRCC patient samples.**

20 The HIF-2 $\alpha$  inhibitor belzutifan was shown to be highly effective in patients with von  
21 Hippel-Lindau disease and has recently gained FDA approval for the treatment of adult patients  
22 with the disease who need treatment for RCC. As our previous results demonstrated that  
23 targeting ACSS2 is an effective strategy to selectively target HIF-2 $\alpha$ , we next moved our  
24 experiments into primary cell cultures isolated from ccRCC patients. A time-course, dose-

1 response treatment was performed on matching normal adjacent tissue and cancer cells from  
2 three patients and cancer cells again observed to be significantly more sensitive than normal  
3 epithelial cells to ACSS2 inhibition (Figure 6A-B and Supplemental Figure 6A-D). Next, we  
4 explored the effect of ACSS2 inhibition on HIF-2 $\alpha$  expression and found that 24 hours of  
5 treatment at all doses of ACSS2i in these clinical specimens was effective at reducing HIF-2 $\alpha$   
6 expression in a cancer cell-specific manner (Figure 6C and 6D). Additionally, HKII expression  
7 increased and both findings were supported by transcriptomic analysis to corroborate our  
8 previous findings that ACSS2 inhibition reduces the expression of genes involved in cholesterol  
9 biosynthesis (Figure 6C-D and Supplemental Figure 6E-F). Lastly, we explored whether ACSS2  
10 inhibition could be an effective means to treat ccRCC that are resistant to HIF-2 $\alpha$  inhibitor  
11 therapy. To this end, we performed a dose-response, time-course ACSS2i treatment in the  
12 previously described HIF-2 $\alpha$  inhibitor resistant 769-P ccRCC cell line and found that ACSS2i,  
13 when provided as single agent, was able to block the growth of these cells (Figure 6E).  
14 Interestingly, a slight synergistic effect was observed when treating 769-P cells with the ACSS2  
15 inhibitor and PT-2385, suggesting that providing ACSS2i in conjunction with HIF-2 $\alpha$  inhibition  
16 could be effective at circumventing resistance to deliver a more effective suppression of HIF-2 $\alpha$   
17 driver signals (Figure 6E). Altogether, these results demonstrate that our in vitro and in vivo  
18 studies translate to ccRCC clinical samples, highlighting ACSS2 as a novel way to target HIF-2 $\alpha$   
19 and major metabolic pathways specifically in cancer cells.

20

## 21 **DISCUSSION**

22 ACSS2 has recognized functions in the dynamic interplay of stress responses, including  
23 interaction with HIF-2 $\alpha$  in the setting of adaptive responses to oxygen and nutrient limited states  
24 [29, 30, 35, 36, 45]. In clear cell renal cell carcinoma, the pseudohypoxic state is defined by high  
25 level, constitutive HIF-2 $\alpha$  signaling that is unimpeded by normal stress signals. We sought to

1 directly interrogate the interaction of ACSS2-mediated acetylation to maintain the stability of  
2 HIF-2 $\alpha$  in the absence of *VHL* and provide a key driver of these tumors [46-49]. Recent work  
3 has advanced a HIF-2 $\alpha$  specific transcriptional inhibitor for treatment of *VHL*-associated renal  
4 cell carcinomas although resistance can develop over time[18, 50]. Parallel strategies to block  
5 the HIF-2 $\alpha$  node, such as targeting alternate mechanisms of HIF-2 $\alpha$  protein stability will be  
6 necessary for adequate disease control.

7 By applying various strategies to alter ACSS2 activity, we showed that ccRCC cells have  
8 some level of dependence on ACSS2 to support HIF-2 $\alpha$  expression, stability, and signaling,  
9 which makes them inherently more vulnerable to ACSS2 inhibition. Importantly, we also  
10 established that ACSS2 inhibition was effective to block the growth of cancer cells derived from  
11 ccRCC patients, as well as the HIF-2 $\alpha$  inhibitor resistant 769-P cell line. Our data suggest that  
12 treatment with an ACSS2 inhibitor could have a potent effect at treating ccRCC patients who  
13 have a *VHL* mutation and could possibly have a synergistic effect when used in combination  
14 with HIF-2 $\alpha$  inhibition. Novel small molecules targeting ACSS2 are in development [34] and  
15 being characterized in preclinical models of cancer. Indeed, while HIF-2 $\alpha$  inhibition with  
16 belzutifan has been revolutionary for VHL syndrome, the effect is slow. Also, although each  
17 cancer in these scenarios displays HIF-2 $\alpha$  activation and transcriptional dependencies, simple  
18 inhibition of dimerization does not promote cell death promptly. We show here that acetylation  
19 via ACSS2 is important for HIF-2 $\alpha$  stabilization, that inhibiting ACSS2 reduces transcription of  
20 EPAS1 as well as induces protein degradation via a secondary mechanism. This more potent  
21 blockade effectively shuts down hypoxia transcription and selectively impairs mitochondrial  
22 function in a way that proves to be lethal to cells that are dependent on HIF-2 $\alpha$  signaling.

23 *Vhl* is mutated in over 70% of ccRCC and aberrant HIF-2 $\alpha$  signaling persists due to a  
24 lack of an effective degradation mechanism. The identification and characterization of  
25 alternative HIF-2 $\alpha$  degradation pathways could manifest into clinically relevant findings.



1 Recently, the mitochondria-associated E3 ubiquitin ligase MUL1 has been shown to indirectly  
2 regulate the degradation of HIF-1 $\alpha$  through its action of UBXN7, and was also found to promote  
3 autophagy and be suppressed in ccRCC cancer cells [24, 51]. Given the high level of homology  
4 between HIF-1 $\alpha$  and HIF-2 $\alpha$  and the link made to MUL1 and ccRCC, we rationalized  
5 interrogating a link between ACSS2 and MUL1 as a mechanism to alter HIF-2 $\alpha$  stability.  
6 Identifying that MUL1 directly interacts with HIF-2 $\alpha$  and that ACSS2 inhibition can enhance  
7 MUL1 expression and its interaction with HIF-2 $\alpha$ , implicates MUL1 as a potential mechanistic  
8 link as to how ACSS2 activity regulates HIF-2 $\alpha$  in a tumor lacking *Vhl* (Supplemental Figure  
9 6G). Beyond direct polyubiquitin-mediated degradation, it has also been demonstrated that  
10 MUL1 can contribute to the degradation of targets such as Mitofusin 1 via mitophagy [25, 27].  
11 Interestingly, it was recently shown that metabolic stress induces the nuclear localization of  
12 ACSS2, where it promotes acetylation and interacts with TFEB to facilitate the transcription of  
13 genes involved in lysosomal biogenesis and autophagy [39]. Taking these findings into  
14 consideration with our own, it would be intriguing to investigate the involvement of mitophagy in  
15 the ACSS2-dependent degradation of HIF-2 $\alpha$ .

16 Acetate is a major precursor to produce acetyl-CoA, particularly under times of metabolic  
17 stress. While citrate-derived acetyl-CoA has been shown to be more heavily utilized in lipid  
18 synthesis [52, 53], acetyl-CoA produced from ACSS2 is thought to have more of a role in post-  
19 translational and epigenetic regulation [29, 31, 38]. Though the findings we describe here  
20 remain focused on the relationship between ACSS2 and HIF-2 $\alpha$ , the role of ACSS2 in  
21 supporting histone acetylation and global transcriptional regulation cannot be ignored. It is likely  
22 that manipulating ACSS2 activity causes shifts in epigenetic patterns, which could have a much  
23 more global impact on biological processes and signaling pathways. Future studies will be  
24 aimed at dissecting the role of ACSS2 in epigenetic maintenance in ccRCC.



1 Exploration into the clinically translatable effects of pharmacologically targeting ACSS2  
2 has yet to commence. The results of our study demonstrate ACSS2 inhibition is a well-tolerated  
3 and effective strategy to ablate HIF-2 $\alpha$  expression and signaling in pre-clinical models of  
4 ccRCC. Furthermore, when we employed a cell line known to be resistant to HIF-2 $\alpha$  inhibition,  
5 targeting ACSS2 proved capable of overcoming this resistance. This is the first study in ccRCC  
6 to highlight ACSS2 as an integral mediator of HIF-2 $\alpha$  protein stability likely by regulating the  
7 post-translational modification landscape and MUL1-directed degradation. These novel methods  
8 of regulating HIF-2 $\alpha$  could provide a much-needed approach to complement and enhance the  
9 efficacy of treatment in populations resistant to HIF-2 $\alpha$  inhibition.

## 10 **METHODS**

### 11 ***Materials Availability***

12 Pharmacological agents used in this study were acquired commercially and available at  
13 Selleckchem. Mice used in this study were acquired commercially and available at Jackson  
14 Laboratories. Stable cell lines carrying targeted shRNA or with different constructs are available  
15 through establishment of Material Transfer Agreement between Vanderbilt University Medical  
16 Center and requesting institution.

### 17 ***Experimental Models***

#### 18 ***Cell Cultures***

19 HKC cells were a gift from L.C. Racusen. HEK293T, A498, 786-O, and 769-P cell lines  
20 were obtained from the ATCC. Prior to experimentation, all cell lines were tested for  
21 Mycoplasma contamination using the ATCC Universal Mycoplasma detection kit (ATCC, catalog  
22 number 30-1012K). HEK293T, HKC, and A498 cell lines were cultured using Gibco Dulbecco's  
23 Modified Eagle Medium (DMEM) supplemented with 10% fetal bovine serum (FBS), 1% L-  
24 glutamine, and 10 mL/L penicillin/streptomycin (Sigma). 768-O and 769-P cell lines were

1 cultured using Gibco RPMI-1640 supplemented with 10% FBS, 1% L-glutamine (Sigma), and 10  
2 mL/L penicillin/streptomycin (Sigma). All cells were maintained at 37°C in a 5% CO<sub>2</sub> incubator.

### 3 ***Animal Studies***

4 6-week old male NOD-scid IL2Rg<sup>null</sup> (NSG) mice were purchased from The Jackson  
5 Laboratory (catalog number 005557) and utilized in all tumorigenesis xenograft models. Mice  
6 were housed five to a cage in a temperature- and humidity-controlled space (20-25°C, 45%–  
7 64% humidity) with regulated water and lighting (12 h light/dark) within the animal facility. All in  
8 vivo mouse studies designed and performed in accordance to animal protocols that were  
9 approved by the Institutional Animal Care and Use Committee of VUMC. Prior to inoculation,  
10 786-O cells were cultured as described above then trypsinized, counted, and resuspended in  
11 growth media and Matrigel at a 1:1 ratio. For all in vivo experiments, NSG mice were  
12 subcutaneously injected with 100 µl of the cell suspension providing 5x10<sup>6</sup> cells. Mice in  
13 pharmacological studies were then subjected to daily treatment with vehicle control or 15 mg/kg  
14 ACSS2i delivered via intraperitoneal injection. Alternatively, mice which were inoculated with  
15 786-O cells transduced to express the pTRIPZ doxycycline-inducible shRNA system were  
16 provided a 200 mg/kg doxycycline rodent diet (Bio-Serv) and allowed to feed ad libitum. Tumor  
17 burden was monitored via weekly manual, digital caliper measurement with intermittent  
18 measurements taken as needed. Mice were euthanized once the first tumor reached size  
19 endpoint (1,000 mm<sup>3</sup>) or if discomfort was observed as outlined in the IACUC approved  
20 protocol.

### 21 ***Patient Samples***

22 Primary cell cultures were derived from tumors of patients diagnosed with clear cell renal  
23 cell carcinoma being treated at Vanderbilt University Medical Center. Informed written consent  
24 was collected from all patients whose samples were used in this study and all samples were

1 processed and utilized in accordance with the IRB protocol (151549). Single cell suspensions  
2 were generated from the tumors and were subsequently cultured in Gibco RPMI-1640 media  
3 supplemented with 10% FBS, 1% L-Glutamine (Sigma), B-27 supplement (Gibco; 10 mL, 50x  
4 stock), and 1x Antibiotic-Antimycotic (Gibco). Fresh growth media was provided every other day  
5 for approximately 10 days until a monolayer of epithelial cells was established, at which point  
6 the primary cells were able to be passaged.

7

## 8 ***Method Details***

### 9 ***Protein Extraction and Western Blotting***

10 Cells were harvested and suspended in RIPA buffer supplemented with 1x Halt protease  
11 inhibitor cocktail (ThermoFisher) and subjected to mechanical needle lysing with a 25G needle  
12 (BD) while being kept on ice. Cell lysates were pelleted via centrifugation at 14,000 x g for 5  
13 minutes at 4°C and supernatants were transferred to fresh Eppendorf tubes for immediate  
14 analysis via SDS-PAGE or preservation at -20°C. Protein concentrations were determined using  
15 the BCA protein quantification method. For SDS-PAGE analysis, 50 µg of protein per sample  
16 was loaded into and run on a 4-20% gradient polyacrylamide gel (Bio-rad), followed by transfer  
17 onto a PVDF membrane. The membranes were then subjected to immunoblotting with the  
18 primary antibodies found in **Supplemental Table 1**. For western blot analysis, β-Actin served as  
19 the loading control.

20

### 21 ***Immunoprecipitation***

22 Cell lysates were prepared as described above and 500 µg of total protein per sample  
23 was first cleared via incubation with protein A agarose beads at 4°C for 1 hour then spun down

1 at 3,500 x g for 10 minutes at 4°C. The pre-cleared lysates were then transferred to fresh  
2 Eppendorf tubes and immunoprecipitation commenced via incubation with the primary antibody  
3 overnight at 4°C. The following day, 30 µl of a 50% protein A agarose bead slurry was added to  
4 the immunoprecipitation reactions and continued incubating for 2 hours at 4°C on a rotator. The  
5 immunoprecipitations were then microcentrifuged at 3,500 x g for 10 minutes at 4°C to collect  
6 the beads, which were then washed five times with Ripa buffer supplemented with protease  
7 inhibitors. After the final wash, the pelleted beads were resuspended with 3X SDS sample  
8 buffer, vortexed briefly, then microcentrifuged at 14,000 x g for 1 minute at room temperature.  
9 Samples were then heated at 95°C for 5 minutes, microcentrifuged at 14,000 x g for 1 minute at  
10 room temperature and loaded into a gel for SDS-PAGE to then be analyzed via western blotting.

11

## 12 ***Lentiviral Transduction***

13 HEK293T cells were used for packaging the vectors in Supplemental Table 2 into  
14 lentivirus. HEK293T cells were allowed to reach 70% confluency and on the day of transfection,  
15 1 hour prior to transfection growth media was replaced with Optimem. For each plate, a  
16 transfection cocktail was prepared using 20 µg of the experimental plasmid (**Supplemental**  
17 **Table 2**), 15 µg PAX2, 6.5 µg of pMD2.G, 62 µl of CaCl<sub>2</sub>, and sterile dH<sub>2</sub>O to bring the total  
18 volume to 500 µl, then 500 µl of 2X HBS was added and mixed by pipetting. The transfection  
19 media was then added to the HEK293T cells, gently swirled, and incubated for 5-7 hours at  
20 37°C. Transfection medium was then discarded and replaced with 10-12 mL of fresh growth  
21 media and the cells were allowed to produce viral particles for 48-72 hours. The lentiviral  
22 supernatants were then collected and passed through a 0.45 micron filter to be used  
23 immediately or stored at -80°C for later use.

1           Lentiviral transduction of 786-O cells was performed by mixing 1 mL lentivirus, 6.5  $\mu$ l of  
2   10 mg/mL polybrene, and 7 mL growth media and incubating for 24 hours at 37°C. The next  
3   day, transduction media was replaced with fresh growth media and cells were returned to 37°C  
4   incubator for another 24 hours. On the following day, the media of the transduced cells was  
5   supplemented with the antibiotic corresponding to the selectable antibiotic resistance marker in  
6   each plasmid for 24 hours, and the resistant clones were expanded for experimental use.

7

### 8           ***RNA Isolation and qRT-PCR***

9           Total RNA extracts were isolated and purified using the RNeasy RNA isolation kit  
10   (Qiagen) and converted to cDNA via reverse transcription (Applied Biosystems, High Capacity  
11   cDNA Reverse Transcription kit). For each experiment, 25 ng of cDNA per sample was  
12   combined with Taqman Universal Master Mix (Applied Biosystems) and RNase-free water in a  
13   96-well reaction plate and qRT-PCR was performed using a Bio-Rad CFX96 thermocycler.  
14   Primers used for qRT-PCR reactions were Epas1 (Hs01026149\_m1), HKII (Hs00606086\_m1),  
15   SLC2A1 (Hs00892681\_m1), and 18S rRNA (Hs99999901\_s1). Data analysis was performed  
16   using CFX Manager software (Bio-Rad) and transcript abundance was determined via the  $\Delta\Delta$ Ct  
17   with normalization to 18S rRNA.

18

### 19           ***Metabolic Gene Expression***

20           To analyze changes in expression of genes involved in metabolism, we extracted RNA  
21   as described above and performed a gene expression assay using the Nanostring nCounter  
22   Metabolic Pathways panel. The assay was performed by Vanderbilt Advanced Technologies for  
23   Genomics (VANTAGE) core facility following the manufacturer's recommended procedures.  
24   RNA concentrations were determined via Qubit and normalized to 20ng/ $\mu$ l. For each sample

1 hybridization reaction, we used 100 ng of total RNA and hybridizations were performed for a  
2 total of 20 hours. Analysis of raw data was performed using the nSolver Analysis Software 4.0  
3 (Nanostring). For all analyses, the background threshold parameters were set to the mean of 8  
4 negative control spike-in genes and mRNA expression was normalized to the geometric mean  
5 of 6 positive control spike-in genes and 20 housekeeping genes (ABCF1, AGK, COG7, DHX16,  
6 DNAJC14, EDC3, FCF1, G6PD, MRPS5, NRDE2, OAZ1, POLR2A, SAP130, SDHA, STK11IP,  
7 TBC1D10B, TBP, TLK2, UBB, and USP39).

8 Data was analyzed by ROSALIND® (<https://rosalind.bio/>), with a HyperScale  
9 architecture developed by ROSALIND, Inc. (San Diego, CA). Read Distribution percentages,  
10 violin plots, identity heatmaps, and sample MDS plots were generated as part of the QC step.  
11 The limma R library was used to calculate fold changes and p-values and perform optional  
12 covariate correction. Clustering of genes for the final heatmap of differentially expressed genes  
13 was done using the PAM (Partitioning Around Medoids) method using the fpc R library that  
14 takes into consideration the direction and type of all signals on a pathway, the position, role and  
15 type of every gene, etc. Hypergeometric distribution was used to analyze the enrichment of  
16 pathways, gene ontology, domain structure, and other ontologies. The topGO R library, was  
17 used to determine local similarities and dependencies between GO terms in order to perform  
18 Elim pruning correction. Several database sources were referenced for enrichment analysis,  
19 including Interpro, NCBI, MSigDB, REACTOME, WikiPathways. Enrichment was calculated  
20 relative to a set of background genes relevant for the experiment.

21

## 22 ***Crystal Violet Cell Growth Assay***

23 To assess the impact of the experimental conditions on cell growth,  $2.5 \times 10^4$  or  $1 \times 10^5$   
24 cells were seeded into 12-well or 6-well plates, respectively, and allowed to adhere for 24

1 hours. On the following day, growth media was supplemented with vehicle, 1 µg/mL  
2 doxycycline, or various doses of the ACSS2 inhibitor and the effect on growth was monitored  
3 over time by staining with a 1% crystal violet solution prepared in 20% methanol and 80% dH<sub>2</sub>O.  
4 After imaging, the crystal violet stain was then stripped using a 1% deoxycholate solution, which  
5 was transferred to a 96-well plate and read on a Promega GloMax plate-reader at 560 nm to  
6 quantify the crystal violet staining.

7

### 8 ***BrdU Cell Proliferation Assay***

9 To determine the impact of experimental conditions on proliferation, we used a BrdU cell  
10 proliferation ELISA kit (Abcam, catalog number ab126556) following the manufacturer's  
11 suggested protocol. Briefly, cells were seeded at a density of 1 x 10<sup>4</sup> cells/well in normal growth  
12 media. Additionally, a duplicate set of cells to those in the experiment were seeded and did not  
13 receive BrdU labeling reagent, while several wells were also left absent of cells to thoroughly  
14 account for background. For 24-hour measurements, growth media was supplemented with  
15 ACSS2 inhibitor or doxycycline, where applicable, and allowed to incubate for 22 hours at 37°C.  
16 BrdU labeling solution was then added for the final 2 hours of the 24-hour incubation before  
17 continuing the ELISA protocol. For 48-hour measurements growth media was supplemented  
18 with ACSS2 inhibitor and incubated for 24 hours at 37°C before adding the BrdU labeling  
19 solution for the final 24 hours of the 48-hour incubation. Following BrdU labeling, cells were  
20 fixed for 30 minutes with 1X fixing solution, washed 3 times with 1X wash buffer, and then  
21 incubated with detector antibody for 1 hour at room temperature. After incubation with the  
22 detector antibody, cells were washed 3 times with 1X wash buffer followed by the addition of 1X  
23 Peroxidase Goat Anti-Mouse IgG Conjugate for 30 minutes at room temperature. The ELISA  
24 reactions were washed 3 more times with 1X wash buffer and a final time with distilled water.  
25 After patting plates dry, TMB Peroxidase substrate was added and reactions incubated for 30

1 minutes at room temperature in the dark. The reactions were stopped via the addition of stop  
2 solution and BrdU incorporation was quantified by reading the plates at 450 nm on a GloMax  
3 plate-reader.

4

#### 5 ***Tumor Sphere Formation Assay***

6 786-O cells were seeded onto 12- well ultra-low attachment plates (Corning) at a density  
7 of  $1 \times 10^3$  cells per well. Cells were subjected to treatment immediately following plating and  
8 fresh growth media with vehicle or the ACSS2 inhibitor was provided every other day. Sphere  
9 formation was monitored via microscope daily and after 7 days, images were captured at 4X  
10 and 10X magnification on a Keyence BZ-X800 microscope.

11

#### 12 ***Anchorage-Independent Growth Assay***

13 Tumorigenic potential was evaluated using an anchorage-independent growth assay.  
14 Briefly, a 2.5% agarose solution was prepared using low-melt agarose and autoclaved dH<sub>2</sub>O.  
15 This solution was diluted 1:4 in growth media and used to coat 6-well plates which were  
16 returned to the 37°C incubator and allowed to set, while cells were trypsinized and counted. For  
17 each condition,  $1 \times 10^5$  cells were resuspended in 9 mL of growth media and 1 mL of a 3%  
18 agarose solution (0.3% final concentration) and 1 mL ( $1 \times 10^4$  cells) of the cell solution was  
19 added per well. The top layer was allowed to set for an hour at 37°C at which point growth 2 mL  
20 growth media was added to each well. Growth medium and treatments, where applicable, were  
21 exchanged every other day and colony formation was monitored via microscope. Images of  
22 colonies were captured using EVOS imaging system.

23



1            ***Immunohistochemistry Staining and Imaging***

2            Tumor specimens were harvested immediately following animal euthanasia. Each tumor  
3 was washed with cold PBS and then fixed overnight with 10% neutral buffered formalin. The  
4 tumors were then paraffin-embedded, sectioned, and stained by the Translational Pathology  
5 Shared Resource facility at VUMC using standard IHC procedures. Images of stained tumor  
6 sections were obtained using an Olympus light microscope and “name” imaging software.

7

8            ***HIF-2 $\alpha$  Protein Stability Assay***

9            To assess the impact of ACSS2 inhibition on HIF-2 $\alpha$  protein stability, 786-O cells were  
10 treated with 1  $\mu$ M of the proteasomal inhibitor MG132 for 1 hour. After the initial incubation with  
11 MG132, growth media was exchanged and supplemented with DMSO or the ACSS2 inhibitor for  
12 24 hours. Upon completion of the treatments, cell lysates were prepared as described above  
13 and analyzed via SDS-PAGE and western blotting. HIF-2 $\alpha$  expression was quantified using  
14 ImageJ and normalized to  $\beta$ -Actin.

15

16            ***GC/MS for Cholesterol Quantification***

17            Lipids were extracted using a previously described method [54]. Briefly, the extracts  
18 were filtered, and lipids recovered in the chloroform phase. Individual lipid classes were  
19 separated by thin layer chromatography using Silica Gel 60 A plates developed in petroleum  
20 ether, ethyl ether, acetic acid (80:20:1) and visualized by rhodamine 6G. Phospholipids,  
21 diglycerides, triglycerides and cholesteryl esters were scraped from the plates and methylated  
22 using BF<sub>3</sub> /methanol as described previously [55]. The methylated fatty acids were extracted  
23 and analyzed by gas chromatography. Gas chromatographic analyses were carried out on an

1 Agilent 7890A gas chromatograph equipped with flame ionization detectors, a capillary column  
2 (SP2380, 0.25 mm x 30 m, 0.25  $\mu$ m film, Supelco, Bellefonte, PA). Helium was used as a  
3 carrier gas. The oven temperature was programmed from 160 °C to 230 °C at 4 °C/min. Fatty  
4 acid methyl esters were identified by comparing the retention times to those of known  
5 standards. Inclusion of lipid standards with odd chain fatty acids permitted quantitation of the  
6 amount of lipid in the sample. Dipentadecanoyl phosphatidylcholine (C15:0), diheptadecanoin  
7 (C17:0), triicosenoin (C20:1), and cholesteryl eicosenoate (C20:1) were used as standards.  
8 For total cholesterol, internal standard (5-a-cholestane) was added to a portion of the lipid  
9 extract and then saponified at 80 °C in 1 N KOH in 90% methanol for 1 hour. The  
10 nonsaponifiable sterol was extracted into hexane, concentrated under nitrogen, and then  
11 solubilized in hexane to inject onto the gas chromatograph. For unesterified cholesterol, internal  
12 standard is added to a portion of the lipid extract, concentrated under nitrogen and then  
13 solubilized in hexane to inject onto the gas chromatograph. The Agilent 7890A gas  
14 chromatograph was equipped with an HP-50+ column (0.25 mm i.d x 30 m, Agilent) and a flame  
15 ionization detector. The oven temperature was programmed from 260 °C to 280 °C and helium  
16 was used as the carrier gas [56].

17

### 18 ***Acetate Quantitation Assay***

19 To monitor ACSS2 activity, acetate concentrations in the growth media were measured  
20 over time using an acetate quantitation colorimetric assay (BioVision, catalog number K658)  
21 using the manufacturer's suggested protocol. Briefly, cells were seeded at a density of  $2.5 \times 10^5$   
22 cells/well in a 6-well plate. The following day fresh growth media was added to the cells, as well  
23 as a blank well, supplemented with ACSS2i or doxycycline, where applicable, and incubated for  
24 24 hours at 37°C. Growth media was collected after the 24-hour incubation and immediately  
25 processed for analysis with the colorimetric assay. For each sample, 25  $\mu$ l of media was

1 combined with 25  $\mu$ l of assay buffer and 50  $\mu$ l of the reaction buffer using the manufacturer  
2 provided reagents and guidelines. Following a 40-minute incubation at room temperature,  
3 acetate concentration measurements were obtained via colorimetric detection at OD450 nm  
4 using a GloMax plate-reader.

5

## 6 ***Transmission Electron Microscopy***

7 All electron microscopy reagents were purchased from Electron Microscopy Sciences.  
8 Cell cultures were grown to approximately 80% confluency, subjected to treatment conditions,  
9 and fixed with 2.5% glutaraldehyde in 0.1 M cacodylate for 1 hour at room temperature followed  
10 by 24 hours at 4°C. After fixation the cells were mechanically lifted from the tissue culture  
11 plates and pelleted then sequentially post-fixed with 1% tannic acid, 1% OsO<sub>4</sub>, and en bloc  
12 stained with 1% uranyl acetate. Samples were dehydrated in a graded ethanol series, infiltrated  
13 with Quetol 651 based Spurr's resin, and polymerized at 60°C for 48 hours. Ultrathin sections  
14 were prepared on a UC7 ultramicrotome (Leica) with a nominal thickness of 70 nm and  
15 collected onto 300 mesh nickel grids. Sections were stained with 2% uranyl acetate and lead  
16 citrate.

17 Samples were imaged using a Tecnai T12 operating at 100 kV equipped with an AMT  
18 NanoSprint CMOS camera using AMT imaging software. Analysis of the TEM data was  
19 performed in FIJI.

20

## 21 ***Mitochondrial Biogenesis Assay***

22 The synthesis of mitochondria was assessed using a Mitochondrial Biogenesis In-Cell  
23 ELISA colorimetric kit (Abcam, catalog number ab110217), which measures the abundance of

1 subunit I of complex IV (mtDNA-encoded) and the 70 kDa subunit of complex II (nuclear-  
2 encoded). For each experiment, the manufacturer's suggested procedures were followed.  
3 Briefly,  $1.5 \times 10^4$  cells were seeded into the wells of a 96-well plate and subjected to treatments  
4 24 hours later. Upon completion of the experimental conditions, cells were fixed for 20 minutes  
5 with 4% paraformaldehyde followed by 3 washed with PBS and the plates were then blotted dry.  
6 Subsequently, 100  $\mu$ l of 0.5% acetic acid was added to each well for 5 minutes to block  
7 endogenous alkaline phosphatase activity. The wells were then washed once again with PBS  
8 followed by the addition of 1X permeabilization buffer for 30 minutes. Following  
9 permeabilization, cells were incubated with 1X blocking solution for 2 hours followed by  
10 overnight incubation with primary antibody at 4°C. After incubation with primary antibody, cells  
11 were washed 3 times with PBS and then incubated with secondary antibody for 1 hour at room  
12 temperature. Secondary antibody was then removed and the cells were washed 4 times with 1X  
13 wash buffer. Expression of the 70 kDa subunit of complex II (SDH-A) and subunit I of complex  
14 IV (COX-I) was then detected and quantified by wavelength detection at 405 nm and 600 nm,  
15 respectively, using a GloMax plate reader.

16

### 17 ***UALCAN and GEPIA Databases***

18 TCGA and CPTAC expression analyses were performed using the publicly accessible  
19 UALCAN cancer database and GEPIA database [57, 58]. The effect of MUL1 gene expression  
20 on patient survival in the kidney renal clear cell carcinoma dataset (KIRC) was determined by  
21 comparing patient outcome in low vs high expression populations. MUL1 gene expression was  
22 analyzed across individual cancer stages in the KIRC TCGA dataset and expression was  
23 statistically compared to expression in normal adjacent tissue. Mul1 protein expression in  
24 tumors was analyzed in the clear cell RCC dataset and statistically compared to expression in  
25 normal adjacent tissue.

## 1 **Author's Disclosures**

2 WKR received an unrestricted grant from the VICC and support from the VICC-Incyte alliance  
3 JCR is a founder, scientific advisory board member, and stockholder of Sitryx Therapeutics, a  
4 scientific advisory board member and stockholder of Caribou Biosciences, a member of the  
5 scientific advisory board of Nirogy Therapeutics, has consulted for Merck, Pfizer, and Mitobridge  
6 within the past three years, and has received research support from Incyte Corp., Calithera  
7 Biosciences, and Tempest Therapeutics. KEB has received funding to the institution from BMS-  
8 IASLC-LCFA, consulted for Aravive, and served on the advisory board for Aveo, BMS, Exelexis,  
9 and Seagen. The remaining co-authors have no conflicts to disclose.

## 10 **Author's Contributions**

11 Z.A.B. performed most of the experimental work, data analysis, and statistical analysis. Z.A.B.,  
12 J.C.R., and W.K.R. participated in study conception and design, data interpretation, and drafting  
13 manuscript. W.A.B. and E.K.A. helped with experimental work. E.S.K. was responsible for  
14 obtaining electron microscopy images. M.W.W., R.A.H., and M.L. processed patient samples  
15 and prepared primary cell cultures for experimental work. K.E.B. provided access to patient  
16 samples. All co-authors assisted with reviewing and editing manuscript.

## 17 **Acknowledgments**

18 The authors give special thanks to their relevant funding sources. This work was supported by  
19 AACR (WKR), R01 CA21797 (JCR) and institutional research funding from Bristol-Myers  
20 Squibb, Merck, Pfizer, Calithera Biosciences, Peloton, and Incyte. ZAB is supported by the  
21 Integrated Biological Systems Training in Oncology Ruth L. Kirschstein NRSA training grant  
22 (5T32CA119925-12). VUMC Lipid Core which is supported by DK059637 and DK020593.  
23 Electron microscopy was performed in part through the use of the Vanderbilt Cell Imaging  
24 Shared Resource (supported by NIH grants CA68485, DK20593, DK58404, DK59637 and

1 EY08126). Immunohistochemical staining was performed in part through the use of the  
2 Translational Pathology Shared Resource at VUMC. Authors acknowledge use of an active  
3 BioRender license to generate model.

#### 4 REFERENCES

- 5 1. Siegel, R.L., et al., *Cancer Statistics, 2021*. CA: A Cancer Journal for Clinicians, 2021. **71**(1): p. 7-  
6 33.
- 7 2. Muglia, V.F. and A. Prando, *Renal cell carcinoma: histological classification and correlation with*  
8 *imaging findings*. Radiologia brasileira, 2015. **48**(3): p. 166-174.
- 9 3. Gerlinger, M., et al., *Genomic architecture and evolution of clear cell renal cell carcinomas*  
10 *defined by multiregion sequencing*. Nature genetics, 2014. **46**(3): p. 225-233.
- 11 4. Gnarr, J.R., et al., *Mutations of the VHL tumour suppressor gene in renal carcinoma*. Nature  
12 Genetics, 1994. **7**(1): p. 85-90.
- 13 5. Herman, J.G., et al., *Silencing of the VHL tumor-suppressor gene by DNA methylation in renal*  
14 *carcinoma*. Proc Natl Acad Sci U S A, 1994. **91**(21): p. 9700-4.
- 15 6. Nickerson, M.L., et al., *Improved identification of von Hippel-Lindau gene alterations in clear cell*  
16 *renal tumors*. Clin Cancer Res, 2008. **14**(15): p. 4726-34.
- 17 7. Sato, Y., et al., *Integrated molecular analysis of clear-cell renal cell carcinoma*. Nature Genetics,  
18 2013. **45**(8): p. 860-867.
- 19 8. Moore, L.E., et al., *Von Hippel-Lindau (VHL) inactivation in sporadic clear cell renal cancer:*  
20 *associations with germline VHL polymorphisms and etiologic risk factors*. PLoS Genet, 2011.  
21 **7**(10): p. e1002312.
- 22 9. Ivan, M., et al., *HIF $\alpha$  targeted for VHL-mediated destruction by proline hydroxylation:*  
23 *implications for O<sub>2</sub> sensing*. Science, 2001. **292**(5516): p. 464-468.
- 24 10. Semenza, G.L. and G.L. Wang, *A nuclear factor induced by hypoxia via de novo protein synthesis*  
25 *binds to the human erythropoietin gene enhancer at a site required for transcriptional activation*.  
26 Molecular and Cellular Biology, 1992. **12**(12): p. 5447-5454.
- 27 11. Cancer Genome Atlas Research, N., *Comprehensive molecular characterization of clear cell renal*  
28 *cell carcinoma*. Nature, 2013. **499**(7456): p. 43-49.
- 29 12. Toma, M.I., et al., *Loss of heterozygosity and copy number abnormality in clear cell renal cell*  
30 *carcinoma discovered by high-density affymetrix 10K single nucleotide polymorphism mapping*  
31 *array*. Neoplasia (New York, N.Y.), 2008. **10**(7): p. 634-642.
- 32 13. Bacigalupa, Z.A. and W.K. Rathmell, *Beyond glycolysis: Hypoxia signaling as a master regulator*  
33 *of alternative metabolic pathways and the implications in clear cell renal cell carcinoma*. Cancer  
34 letters, 2020. **489**: p. 19-28.
- 35 14. Brown, W.A., W.K. Rathmell, and Z.A. Bacigalupa, *It's Clear as Day: HIF Signaling is Driving Force*  
36 *of the Clear Cell Morphology*. KIDNEY, 2021. **19**(1): p. 17.
- 37 15. Du, W., et al., *HIF drives lipid deposition and cancer in ccRCC via repression of fatty acid*  
38 *metabolism*. Nature Communications, 2017. **8**(1): p. 1769.
- 39 16. Syafruddin, S.E., et al., *A KLF6-driven transcriptional network links lipid homeostasis and tumour*  
40 *growth in renal carcinoma*. Nature Communications, 2019. **10**(1): p. 1152.
- 41 17. Qiu, B., et al., *HIF2 $\alpha$ -Dependent Lipid Storage Promotes Endoplasmic Reticulum Homeostasis in*  
42 *Clear-Cell Renal Cell Carcinoma*. Cancer Discov, 2015. **5**(6): p. 652-67.

- 1 18. Choueiri, T.K., et al., *Inhibition of hypoxia-inducible factor-2 $\alpha$  in renal cell carcinoma with belzutifan: a phase 1 trial and biomarker analysis*. *Nature Medicine*, 2021. **27**(5): p. 802-805.
- 2
- 3 19. Courtney, K.D., et al., *Phase I Dose-Escalation Trial of PT2385, a First-in-Class Hypoxia-Inducible Factor-2 $\alpha$  Antagonist in Patients With Previously Treated Advanced Clear Cell Renal Cell Carcinoma*. *Journal of Clinical Oncology*, 2018. **36**(9): p. 867-874.
- 4
- 5
- 6 20. Wallace, E.M., et al., *A Small-Molecule Antagonist of HIF2 $\alpha$  Is Efficacious in Preclinical Models of Renal Cell Carcinoma*. *Cancer Research*, 2016. **76**(18): p. 5491-5500.
- 7
- 8 21. Xu, R., et al., *3-[(1S,2S,3R)-2,3-Difluoro-1-hydroxy-7-methylsulfonylindan-4-yl]oxy-5-fluorobenzonitrile (PT2977), a Hypoxia-Inducible Factor 2 $\alpha$  (HIF-2 $\alpha$ ) Inhibitor for the Treatment of Clear Cell Renal Cell Carcinoma*. *Journal of Medicinal Chemistry*, 2019. **62**(15): p. 6876-6893.
- 9
- 10
- 11 22. Jonasch, E., et al., *Belzutifan for Renal Cell Carcinoma in von Hippel-Lindau Disease*. *N Engl J Med*, 2021. **385**(22): p. 2036-2046.
- 12
- 13 23. Zhang, D., et al., *JNK1 mediates degradation HIF-1 $\alpha$  by a VHL-independent mechanism that involves the chaperones Hsp90/Hsp70*. *Cancer research*, 2010. **70**(2): p. 813-823.
- 14
- 15 24. Cilenti, L., et al., *Mitochondrial MUL1 E3 ubiquitin ligase regulates Hypoxia Inducible Factor (HIF-1 $\alpha$ ) and metabolic reprogramming by modulating the UBXN7 cofactor protein*. *Scientific reports*, 2020. **10**(1): p. 1-15.
- 16
- 17
- 18 25. Li, J., et al., *Mitochondrial outer-membrane E3 ligase MUL1 ubiquitinates ULK1 and regulates selenite-induced mitophagy*. *Autophagy*, 2015. **11**(8): p. 1216-29.
- 19
- 20 26. Prudent, J., et al., *MAPL SUMOylation of Drp1 stabilizes an ER/mitochondrial platform required for cell death*. *Molecular cell*, 2015. **59**(6): p. 941-955.
- 21
- 22 27. Yun, J., et al., *MUL1 acts in parallel to the PINK1/parkin pathway in regulating mitofusin and compensates for loss of PINK1/parkin*. *eLife*, 2014. **3**: p. e01958-e01958.
- 23
- 24 28. Courtney, K.D., et al., *HIF-2 Complex Dissociation, Target Inhibition, and Acquired Resistance with PT2385, a First-in-Class HIF-2 Inhibitor, in Patients with Clear Cell Renal Cell Carcinoma*. *Clinical Cancer Research*, 2020. **26**(4): p. 793-803.
- 25
- 26
- 27 29. Chen, R., et al., *Coordinate regulation of stress signaling and epigenetic events by Acss2 and HIF-2 in cancer cells*. *PLoS One*, 2017. **12**(12): p. e0190241.
- 28
- 29 30. Chen, R., et al., *The acetate/ACSS2 switch regulates HIF-2 stress signaling in the tumor cell microenvironment*. *PloS one*, 2015. **10**(2): p. e0116515.
- 30
- 31 31. Nagati, J.S., et al., *Mammalian acetate-dependent acetyl CoA synthetase 2 contains multiple protein destabilization and masking elements*. *Journal of Biological Chemistry*, 2021. **297**(3).
- 32
- 33 32. Dioum, E.M., et al., *Regulation of hypoxia-inducible factor 2 $\alpha$  signaling by the stress-responsive deacetylase sirtuin 1*. *Science*, 2009. **324**(5932): p. 1289-1293.
- 34
- 35 33. Schug, Z.T., et al., *Acetyl-CoA synthetase 2 promotes acetate utilization and maintains cancer cell growth under metabolic stress*. *Cancer cell*, 2015. **27**(1): p. 57-71.
- 36
- 37 34. Miller, K.D., et al., *Targeting ACSS2 with a Transition-State Mimetic Inhibits Triple-Negative Breast Cancer Growth*. *Cancer Research*, 2021. **81**(5): p. 1252-1264.
- 38
- 39 35. Comerford, S.A., et al., *Acetate dependence of tumors*. *Cell*, 2014. **159**(7): p. 1591-1602.
- 40 36. Mashimo, T., et al., *Acetate is a bioenergetic substrate for human glioblastoma and brain metastases*. *Cell*, 2014. **159**(7): p. 1603-1614.
- 41
- 42 37. Ciraku, L., et al., *O-GlcNAc transferase regulates glioblastoma acetate metabolism via regulation of CDK5-dependent ACSS2 phosphorylation*. *Oncogene*, 2022: p. 1-15.
- 43
- 44 38. Bulusu, V., et al., *Acetate Recapturing by Nuclear Acetyl-CoA Synthetase 2 Prevents Loss of Histone Acetylation during Oxygen and Serum Limitation*. *Cell Reports*, 2017. **18**(3): p. 647-658.
- 45
- 46 39. Li, X., et al., *Nucleus-translocated ACSS2 promotes gene transcription for lysosomal biogenesis and autophagy*. *Molecular Cell*, 2017. **66**(5): p. 684-697. e9.
- 47



- 1 40. Covello, K.L., et al., *HIF-2alpha regulates Oct-4: effects of hypoxia on stem cell function,*  
2 *embryonic development, and tumor growth.* *Genes Dev*, 2006. **20**(5): p. 557-70.
- 3 41. Hu, C.J., et al., *Differential regulation of the transcriptional activities of hypoxia-inducible factor*  
4 *1 alpha (HIF-1alpha) and HIF-2alpha in stem cells.* *Mol Cell Biol*, 2006. **26**(9): p. 3514-26.
- 5 42. Palikaras, K., E. Lionaki, and N. Tavernarakis, *Balancing mitochondrial biogenesis and mitophagy*  
6 *to maintain energy metabolism homeostasis.* *Cell Death & Differentiation*, 2015. **22**(9): p. 1399-  
7 1401.
- 8 43. Shi, G. and G.A. McQuibban, *The mitochondrial rhomboid protease PARL is regulated by PDK2 to*  
9 *integrate mitochondrial quality control and metabolism.* *Cell reports*, 2017. **18**(6): p. 1458-1472.
- 10 44. Shao, D., et al., *PGC-1 beta-regulated mitochondrial biogenesis and function in myotubes is*  
11 *mediated by NRF-1 and ERR alpha.* *Mitochondrion*, 2010. **10**(5): p. 516-27.
- 12 45. Xu, M., et al., *An acetate switch regulates stress erythropoiesis.* *Nature medicine*, 2014. **20**(9): p.  
13 1018-1026.
- 14 46. Kondo, K., et al., *Inhibition of HIF2α is sufficient to suppress pVHL-defective tumor growth.* *PLoS*  
15 *biology*, 2003. **1**(3): p. e83.
- 16 47. Kondo, K., et al., *Inhibition of HIF is necessary for tumor suppression by the von Hippel-Lindau*  
17 *protein.* *Cancer Cell*, 2002. **1**(3): p. 237-246.
- 18 48. Shen, C., et al., *Genetic and functional studies implicate HIF1α as a 14q kidney cancer suppressor*  
19 *gene.* *Cancer discovery*, 2011. **1**(3): p. 222-235.
- 20 49. Gordan, J.D., et al., *HIF-α effects on c-Myc distinguish two subtypes of sporadic VHL-deficient*  
21 *clear cell renal carcinoma.* *Cancer cell*, 2008. **14**(6): p. 435-446.
- 22 50. Cho, H. and W.G. Kaelin. *Targeting HIF2 in clear cell renal cell carcinoma.* in *Cold Spring Harbor*  
23 *symposia on quantitative biology.* 2016. Cold Spring Harbor Laboratory Press.
- 24 51. Yuan, Y., et al., *Mitochondrial E3 ubiquitin ligase 1 promotes autophagy flux to suppress the*  
25 *development of clear cell renal cell carcinomas.* *Cancer science*, 2019. **110**(11): p. 3533-3542.
- 26 52. Wellen, K.E., et al., *ATP-Citrate Lyase Links Cellular Metabolism to Histone Acetylation.* *Science*,  
27 2009. **324**(5930): p. 1076-1080.
- 28 53. Zhao, S., et al., *ATP-Citrate Lyase Controls a Glucose-to-Acetate Metabolic Switch.* *Cell Reports*,  
29 2016. **17**(4): p. 1037-1052.
- 30 54. Folch, J., M. Lees, and G.H. Sloane Stanley, *A simple method for the isolation and purification of*  
31 *total lipids from animal tissues.* *J Biol Chem*, 1957. **226**(1): p. 497-509.
- 32 55. Morrison, W.R. and L.M. Smith, *Preparation of fatty acid methyl esters and dimethylacetals from*  
33 *lipids with boron fluoride-methanol.* *Journal of lipid research*, 1964. **5**(4): p. 600-608.
- 34 56. Rudel, L.L., et al., *Dietary monounsaturated fatty acids promote aortic atherosclerosis in LDL*  
35 *receptor-null, human apoB100-overexpressing transgenic mice.* *Arteriosclerosis, thrombosis,*  
36 *and vascular biology*, 1998. **18**(11): p. 1818-1827.
- 37 57. Chandrashekar, D.S., et al., *UALCAN: A Portal for Facilitating Tumor Subgroup Gene Expression*  
38 *and Survival Analyses.* *Neoplasia*, 2017. **19**(8): p. 649-658.
- 39 58. Tang, Z., et al., *GEPIA: a web server for cancer and normal gene expression profiling and*  
40 *interactive analyses.* *Nucleic Acids Research*, 2017. **45**(W1): p. W98-W102.

41

42

43



1

## 2 **FIGURE LEGENDS**

3 **Figure 1.** ACSS2 is essential for ccRCC growth and proliferation. **A.** Representative images of  
4 crystal violet staining from a dose-response time-course treatment with DMSO or ACSS2  
5 inhibitor in HKC cells. Quantification of three-independent replicates are provided in the graph  
6 below. Statistical significance was determined using Bonferroni's multiple comparisons test. **B.**  
7 Representative images of crystal violet staining from a dose-response time-course treatment  
8 with DMSO or ACSS2 inhibitor in 786-O cells. Quantification of three-independent replicates are  
9 provided in the graph below. Statistical significance was determined using Bonferroni's multiple  
10 comparisons test. **C.** Box and whisker plots showing the absorbance values detected at OD450  
11 nm of BrdU ELISA assays performed on HKC cells treated for 24 hours (left) or 48 hours (right)  
12 with DMSO, 1  $\mu$ M, 5  $\mu$ M, or 10  $\mu$ M ACSS2 inhibitor (n=4). Statistical significance was  
13 determined using Bonferroni's multiple comparisons test (\*\*,  $P < 0.01$ ; \*\*\*\*,  $P < 0.0001$ ; n.s., not  
14 significant). **D.** Box and whisker plots showing the absorbance values detected at OD450 nm of  
15 BrdU ELISA assays performed on 786-O cells treated for 24 hours (left) or 48 hours (right) with  
16 DMSO, 1  $\mu$ M, 5  $\mu$ M, or 10  $\mu$ M ACSS2 inhibitor (n=4). Statistical significance was determined  
17 using Bonferroni's multiple comparisons test (\*\*,  $P < 0.01$ ; \*\*\*,  $P < 0.001$ ; \*\*\*\*,  $P < 0.0001$ ). **E.**  
18 Representative images of 786-O cells transduced with pTRIPZ Control (left), pTRIPZ shACSS2  
19 #1 (center), or pTRIPZ shACSS2 #2 (right) untreated (top) or treated with 2  $\mu$ g/mL doxycycline  
20 for 48 hours (bottom) stained with crystal violet. Bar graph displaying the quantification of crystal  
21 violet staining from three-independent experiments. Statistical significance was determined  
22 using a one-way ANOVA (\*\*,  $P < 0.005$ ). **F.** Box and whisker plots showing the absorbance  
23 values detected at OD450 nm of BrdU ELISA assays performed on 786-O pTRIPZ Control or  
24 786-O pTRIPZ shACSS2 cells treated with 2  $\mu$ g/mL doxycycline for 24 hours (n=4). Two-tailed  
25 paired t-test used to assess statistical significance (\*,  $P < 0.05$ ). **G.** Line plot showing tumor

1 volume over time in mice inoculated with 786-O pTRIPZ Control (black, n=5) or 786-O pTRIPZ  
2 shACSS2 (red, n=5) cells and fed a doxycycline rodent chow. Statistical significance was  
3 determined using multiple two-tailed t-tests. **H.** Box and whisker plot showing individual data  
4 points of tumor weight for pTRIPZ Control and pTRIPZ shACSS2 tumors. Statistical significance  
5 was determined using an unpaired, two-tailed t-test (\*\*\*,  $P < 0.001$ ). **I.** Line plot showing tumor  
6 volume over time in mice inoculated with 786-O cells treated with vehicle (black, n=6) or 15  
7 mg/kg ACSS2 inhibitor (red, n=6). Statistical significance was determined using the Holm-Sidak  
8 method of multiple t-tests. **J.** Box and whisker plot showing individual data points of tumor  
9 weight for mice treated with vehicle (black, n=6) or 15 mg/kg ACSS2 inhibitor (red, n=6).  
10 Statistical significance was determined using an unpaired, two-tailed t-test (\*,  $P < 0.05$ ). **K.**  
11 Representative images taken at 10X magnification of sections from Control (top) and shACSS2  
12 (bottom) tumors stained with CD31 (left) and Periodic Acid Schiff (PAS, right). **L.** Representative  
13 images taken at 10X magnification of sections from Vehicle (top) and 15 mg/kg ACSS2 inhibitor-  
14 treated (bottom) tumors stained with CD31 (left) and Periodic Acid Schiff (PAS, right).

15  
16 **Figure 2.** HIF-2 $\alpha$  gene and protein expression is regulated by ACSS2 activity. **A.** Heatmap  
17 showing differential gene expression expressed as fold change (downregulated by  $-1.5 \geq$  and  
18 upregulated by  $1.5 \leq$ ,  $p\text{-Adj} \leq 0.05$ ) between Control (blue) and shACSS2 (red) groups. Gene  
19 expression clustering on the Y-axis depicts genes that are upregulated (purple) and  
20 downregulated (green) in the Control group. **B.** Heatmap showing differential gene expression  
21 following pathway enrichment (Wikipathways) as fold change (downregulated by  $-1.5 \geq$  and  
22 upregulated by  $1.5 \leq$ ,  $p\text{-Adj} \leq 0.05$ ) between Control (blue) and shACSS2 (red) groups. Gene  
23 expression clustering on the Y-axis depicts genes that are upregulated (purple) and  
24 downregulated (green) in the Control group. Bar graph (right) showing transcript counts from  
25 HIF-2 $\alpha$  RCC Signaling pathway comparing Control (black) and shACSS2 (red) groups.

1 Statistical significance determined using unpaired t-tests without correction for multiple  
2 comparisons (\*\*,  $P < 0.01$ ; \*\*\*,  $P < 0.001$ ; ###,  $P < 0.0001$ ). **C.** Western blot analysis of HIF-2 $\alpha$   
3 and ACSS2 expression following 24-hour doxycycline induction of 786-O pTRIPZ Control and  
4 pTRIPZ shACSS2 cells. **D.** Western blot analysis assessing expression of HIF-2 $\alpha$ , Epo, and  
5 VEGFR2 in 786-O cells treated with DMSO, 1  $\mu$ M, 5  $\mu$ M, or 10  $\mu$ M ACSS2 inhibitor for 24 hours.  
6 **E.** Western blot analysis showing expression of ACSS2, V5-tag, HIF-2 $\alpha$ , VEGFR2, Epo, and  
7 EGLN3 in 786-O cells transduced pLX304 empty vector or pLX304 V5-ACSS2 overexpression  
8 vector. **F.** Box and whisker plot showing the absorbance values detected at OD450 nm of BrdU  
9 ELISA assays performed on 786-O cells transduced pLX304 empty vector or pLX304 V5-  
10 ACSS2 overexpression vector. Statistical significance was determined using an unpaired, two-  
11 tailed t-test (\*\*\*,  $P < 0.001$ ). **G.** Representative images taken at day 21 of an anchorage-  
12 independent growth assay performed using 786-O control or V5-ACSS2 cells transduced  
13 express shControl or shHIF2A. Bar graph showing the number of colonies formed for each  
14 condition from three-independent experiments. Statistical significance determined using two-  
15 way ANOVA and Tukey's multiple comparisons test (\*,  $P$ -value  $< 0.05$ ; \*\*\*,  $P$ -value  $< 0.0005$ ).

16  
17 **Figure 3.** ACSS2 activity mediates HIF-2 $\alpha$  stability. **A.** Western blot depicting HIF-2 $\alpha$   
18 expression in 786-O cells in the absence or presence of a 1-hour incubation with 10  $\mu$ M MG132  
19 prior to being treated with DMSO or 5  $\mu$ M ACSS2 inhibitor for 24 hours. Bar chart (right)  
20 showing densitometry analysis performed using ImageJ on western blot images from three-  
21 independent experiments. Statistical significance determined using multiple unpaired, two-tailed  
22 t-tests (\*,  $P < 0.05$ ; \*\*\*,  $P < 0.0005$ ; ##,  $P < 0.01$ ; \* = t-test performed vs No pre-treatment  
23 DMSO; # = t-test performed vs No pre-treatment ACSS2i). **B.** Kaplan-Meier plot generated from  
24 the KIRC TCGA dataset assessing patient outcome as it relates to MUL1 expression (MUL1<sup>HIGH</sup>  
25 = black, MUL1<sup>LOW</sup> = red). Statistical significance determined automatically via GEPIA database.

1 **C.** Representative images at day 16 of anchorage-independent growth assays performed on  
2 786-O cells transduced to express shControl or shMUL1 and treated with either DMSO, 5  $\mu$ M  
3 ACSS2 inhibitor, or 10  $\mu$ M PT-2385. **D.** Western blot images showing expression of the  
4 mitophagy marker LC3 A/B, K48 polyubiquitination, MUL1, and p62 in 786-O cells treated with  
5 DMSO or 5  $\mu$ M ACSS2 inhibitor for 48 hours. **E.** Western blot analysis showing expression  
6 changes to ACSS2, HIF-2 $\alpha$ , and MUL1 in response to induction of shACSS2. **F.** Western blot  
7 images assessing protein interactions from immunoprecipitations of HIF-2 $\alpha$  or MUL1 performed  
8 on 786-O cells treated with DMSO or 5  $\mu$ M ACSS2 inhibitor for 24 hours.

9  
10 **Figure 4.** ACSS2 activity supports glucose and cholesterol metabolism. **A.** Heatmap (left)  
11 showing differential gene expression expressed as fold change (downregulated by  $-1.1 \geq$  and  
12 upregulated by  $1.1 \leq$ ,  $p\text{-Adj} \leq 0.05$ ) between 24-hour treatment of 786-O cells with DMSO (blue)  
13 and 5  $\mu$ M ACSS2 inhibitor (red) groups. Gene expression clustering on the Y-axis depicts genes  
14 that are upregulated (purple) and downregulated (green) in the DMSO group. Heatmap (right)  
15 showing differential gene expression following pathway enrichment (Wikipathways) as fold  
16 change (downregulated by  $-1.1 \geq$  and upregulated by  $1.1 \leq$ ,  $p\text{-Adj} \leq 0.05$ ) between 24-hour  
17 treatment of DMSO (blue) and 5  $\mu$ M ACSS2 inhibitor (red) groups. Gene expression clustering  
18 on the Y-axis depicts genes that are upregulated (purple) and downregulated (green) in the  
19 DMSO group. **B.** Bar graph showing total cholesterol levels ( $\mu$ g) in 786-O cells treated with  
20 DMSO (black;  $n=3$ ) or 5  $\mu$ M ACSS2i (red;  $n=3$ ) for 24 hours. Statistical significance determined  
21 using an unpaired, two-tailed Student's t-test. **C.** Bar graphs showing relative mRNA abundance  
22 of SLC2A1 (left) and HKII (right) in 786-O cells following 24-hour treatment with DMSO (black)  
23 or 5  $\mu$ M ACSS2 inhibitor (red). Statistical significance determined using an unpaired, two-tailed  
24 Student's t-test. **D.** Western blot analysis showing expression of HIF-2 $\alpha$ , GLUT1, HKII, SREBP-  
25 1, and SREBP-2 in 786-O cells treated with DMSO, 5  $\mu$ M, or 10  $\mu$ M ACSS2 inhibitor for 24

1 hours. **E.** Western blot analysis of ACSS2, HIF-2 $\alpha$ , GLUT1, and HKII protein expression in 786-  
2 O cells transduced to express pLX304 empty vector or pLX304 V5-ACSS2 overexpression  
3 vector.

4

5 **Figure 5.** Targeting ACSS2 elicits cancer cell-specific mitochondria morphology defects  
6 observed by transmission electron microscopy. Representative images of HKC control cell  
7 mitochondria (**A**) and 786-O mitochondria (**B**) treated with DMSO for 72 hours or with 5  $\mu$ M  
8 ACSS2 inhibitor for 24, 48, and 72 hours. **C.** 786-O pTRIPZ Control and shACSS2 cells induced  
9 with 2  $\mu$ g/mL doxycycline for 48 hours. **D.** 786-O cells transduced to overexpress ACSS2 (left)  
10 followed by transduction with shHIF2A (right). **E.** 786-O cells treated with 10  $\mu$ M PT-2385 for 72  
11 hours. Black square insets indicate areas of higher magnification shown to the right of the  
12 images. Scale bars are 1  $\mu$ m for all images.

13

14 **Figure 6.** ACSS2 inhibition selectively impedes cancer cell growth and HIF-2 $\alpha$  expression in  
15 ccRCC patient samples. **A.** Representative images of crystal violet staining from a dose-  
16 response time-course treatment with DMSO or ACSS2 inhibitor in epithelial cells isolated from  
17 ccRCC patient's normal adjacent tissue. Quantification of three-independent replicates are  
18 provided in the graph below. Statistical significance was determined using Bonferroni's multiple  
19 comparisons test (P values provided in table below). **B.** Representative images of crystal violet  
20 staining from a dose-response time-course treatment with DMSO or ACSS2 inhibitor in  
21 epithelial cells isolated from ccRCC patient tumor sections. Quantification of three-independent  
22 replicates are provided in the graph below. Statistical significance was determined using  
23 Bonferroni's multiple comparisons test (P values provided in table below). **C.** Representative  
24 western blot images showing expression of HIF-2 $\alpha$  and HKII in cells isolated from ccRCC

1 patient normal adjacent tissue treated with DMSO, 1  $\mu$ M, 5  $\mu$ M, or 10  $\mu$ M ACSS2 inhibitor for 24  
2 hours. **D.** Representative western blot images showing expression of HIF-2 $\alpha$  and HKII in  
3 epithelial cells isolated from ccRCC patient tumor sections treated with DMSO, 1  $\mu$ M, 5  $\mu$ M, or  
4 10  $\mu$ M ACSS2 inhibitor for 24 hours. **E.** Bar graph showing crystal violet quantification of 769-P  
5 cells (three-independent experiments) in the presence or absence of 10  $\mu$ M PT-2385 treated  
6 with DMSO, 1  $\mu$ M, 5  $\mu$ M, or 10  $\mu$ M ACSS2 inhibitor for 24, 48, and 72 hours. Statistical  
7 significance determined using a two-way ANOVA and Tukey's multiple comparisons test.  
8 Representative images of crystal violet staining from a 72-hour dose-response treatment with  
9 DMSO or ACSS2 inhibitor in 769-P cells.

10 **Supplemental Figure 1. A.** Representative images of crystal violet staining from a dose-  
11 response time-course treatment with DMSO or ACSS2 inhibitor in A498 cells. Quantification of  
12 three-independent replicates are provided in the graph below. Statistical significance was  
13 determined using Bonferroni's multiple comparisons test. **B.** Box and whisker plots showing the  
14 absorbance values detected at OD450 nm of BrdU ELISA assays performed on A498 cells  
15 treated for 24 hours (top) or 48 hours (bottom) with DMSO, 1  $\mu$ M, 5  $\mu$ M, or 10  $\mu$ M ACSS2  
16 inhibitor (n=4). Statistical significance was determined using Bonferroni's multiple comparisons  
17 test (\*, P < 0.05; \*\*\*, P < 0.001; \*\*\*\*, P < 0.0001). **C.** Representative images of 786-O tumor  
18 spheres at day 7 of growth in ultra-low attachment plates treated with either DMSO or 5  $\mu$ M  
19 ACSS2i. Quantification of average sphere area from three-independent replicates are provided  
20 in the bar graph (right). Statistical significance was determined using an unpaired, two-tailed t-  
21 test (\*\*\*, P < 0.001). **D.** Bar graph showing the body weight of shControl + DOX and shACSS2 +  
22 DOX mice at the endpoint of study. **E.** Bar graph showing the body weight of Vehicle- and 15  
23 mg/kg ACSS2i-treated mice at the endpoint of study. **F.** Bar graphs showing quantification of the  
24 percentage of total area staining positive for CD31 (left) or Periodic Acid Schiff (right) in tumor  
25 sections from shControl + DOX or shACSS2 + DOX mice. Statistical significance determined

1 using an unpaired, two-tailed t-test with Welch's correction (\*\*, P-value < 0.005; \*\*\*, P-value <  
2 0.001). **G.** Bar graphs showing quantification of the percentage of total area staining positive for  
3 CD31 (left) or Periodic Acid Schiff (right) in tumor sections from mice treated with Vehicle or 15  
4 mg/kg ACSS2i. Statistical significance determined using an unpaired, two-tailed t-test with  
5 Welch's correction (\*, P-value < 0.05).

6  
7 **Supplemental Figure 2. A.** Bar graph depicting relative abundance of *Epas1* mRNA expression  
8 determined by qRT-PCR in 786-O cells treated with DMSO or 5  $\mu$ M ACSS2 inhibitor for 24  
9 hours. Statistical significance determined by unpaired, two-tailed Student's t-test (\*\*\*, P <  
10 0.001). **B.** Bar graph depicting relative abundance of *Epas1* mRNA expression determined by  
11 qRT-PCR in 786-O cells transduced to express shControl or shHIF2A. Statistical significance  
12 determined by unpaired, two-tailed Student's t-test (\*\*\*, P < 0.001). **C.** Western blot analysis of  
13 HIF-2 $\alpha$  and Actin in the HKC cells treated with DMSO, 1  $\mu$ M, 5  $\mu$ M, or 10  $\mu$ M ACSS2i for 24 and  
14 48 hours. **D.** Western blot analysis of HIF-2 $\alpha$ , ACSS2, and Actin in the 786-O cells transduced  
15 with empty vector (top) or stably overexpressing V5-ACSS2 (bottom) previously developed in  
16 Figure 2 transduced with shControl or shHIF2A targeting constructs.

17  
18 **Supplemental Figure 3. A.** Western blot from replicate experiments depicting HIF-2 $\alpha$   
19 expression in 786-O cells in the absence or presence of a 1-hour incubation with 10  $\mu$ M MG132  
20 prior to being treated with DMSO or 5  $\mu$ M ACSS2 inhibitor for 24 hours. **B.** Box and whisker plot  
21 generated using UALCAN database to access KIRC TCGA dataset and assess MUL1 gene  
22 expression spanning the individual stages of disease. Statistical significance determined  
23 automatically via UALCAN database. **C.** Box and whisker plot generated using UALCAN  
24 database to access KIRC CPTAC dataset and assess MUL1 protein expression in normal



1 kidney and ccRCC samples. Statistical significance determined automatically via UALCAN  
2 database. **D.** Bar graph showing the number of colonies formed for each condition from three-  
3 independent experiments. Statistical significance determined using two-way ANOVA and  
4 Tukey's multiple comparisons test (\*\*\*, P-value < 0.0005; \*\*\*\*, P-value < 0.0001). **E.** Western blot  
5 analysis of HIF-2 $\alpha$ , ACSS2, MUL1, and Actin in the HKC cells treated with DMSO, 5  $\mu$ M, or 10  
6  $\mu$ M ACSS2i for 24 hours.

7  
8 **Supplemental Figure 4. A.** Bar graph showing transcript counts for genes involved in the  
9 cholesterol biosynthesis pathway extracted from the NanoString dataset developed from the  
10 experiment in Figure 4A where 786-O cells were treated with DMSO (black) or 5  $\mu$ M ACSS2i  
11 (red) for 24 hours. Statistical significance determined by performing multiple unpaired, two-tailed  
12 t-tests (\*, P-value < 0.05; \*\*\*, P-value < 0.0005). **B.** Bar graph showing average glucose  
13 concentrations in growth media in 786-O cells treated with DMSO (black) or 5  $\mu$ M ACSS2i (red)  
14 at 0, 24, and 48 hour time points. Statistical significance determined using unpaired, two-tailed t-  
15 test (\*\*\*, P-value < 0.005). **C.** Bar graph showing relative concentrations of acetate in growth  
16 media of 786-O cells treated with DMSO, 1  $\mu$ M, 5  $\mu$ M, or 10  $\mu$ M ACSS2 inhibitor for 24 hours.  
17 Data are presented as Log<sub>2</sub> values of fold change. Statistical significance determined using an  
18 ordinary one-way ANOVA and Bonferroni's multiple comparisons test (\*\*, P-value < 0.01; \*\*\*, P-  
19 value < 0.001). **D.** Bar graph showing relative concentrations of acetate in growth media of 786-  
20 O cells transduced to express V5-ACSS2 overexpression vector, or the DOX-inducible  
21 shControl or shACSS2 constructs. Data are presented as Log<sub>2</sub> values of fold change. Statistical  
22 significance determined using an ordinary one-way ANOVA and Bonferroni's multiple  
23 comparisons test (\*, P-value < 0.05; \*\*, P-value < 0.01; \*\*\*\*, P-value < 0.0001).



1 **Supplemental Figure 5. A.** Western blot analysis of PGC1 $\beta$ , Opa-1, Mitofusin 1, Mitofusin 2,  
2 and Actin using the same membrane from Supplemental Figure 3E. Experiment was performed  
3 in HKC cells treated with DMSO, 5  $\mu$ M or 10  $\mu$ M ACSS2 inhibitor for 24 hours. **B.** Western blot  
4 analysis of PGC1 $\alpha$ , PGC1 $\beta$ , Opa-1, Mitofusin 1, Mitofusin 2, Drp1, phospho-Drp1 (S616), and  
5 Actin using same membrane as Figure 3D. Experiment performed in 786-O cells treated with  
6 DMSO or 5  $\mu$ M ACSS2 inhibitor for 24 hours. **C.** Bar graph with individual data points showing  
7 quantification of mitochondrial biogenesis in HKC cells treated with DMSO, 5  $\mu$ M or 10  $\mu$ M  
8 ACSS2 inhibitor for 24 hours. Data is shown as the ratio of expression of COX-I to SDH-A  
9 quantified by wavelength detection at 405 nm (SDH-A) and 600 nm (COX-I). Statistical  
10 significance assessed using an ordinary one-way ANOVA and Bonferroni's multiple  
11 comparisons test. **D.** Bar graph with individual data points showing quantification of  
12 mitochondrial biogenesis in 786-O cells treated with DMSO, 5  $\mu$ M or 10  $\mu$ M ACSS2 inhibitor for  
13 24 hours. Data is shown as the ratio of expression of COX-I to SDH-A quantified by wavelength  
14 detection at 405 nm (SDH-A) and 600 nm (COX-I). Statistical significance determined using an  
15 ordinary one-way ANOVA and Bonferroni's multiple comparisons test (\*, P-value < 0.05; \*\*\*, P-  
16 value < 0.001). **E.** Bar graph with individual data points showing quantification of mitochondrial  
17 biogenesis in 786-O pTRIPZ shControl and shACSS2 cells treated with doxycycline for 24  
18 hours. Data is shown as the ratio of expression of COX-I to SDH-A quantified by wavelength  
19 detection at 405 nm (SDH-A) and 600 nm (COX-I). Statistical significance determined using an  
20 unpaired, two-tailed t-test (\*\*\*\*, P-value < 0.0001). **F.** Western blot analysis of PGC1 $\alpha$ , PGC1 $\beta$ ,  
21 Opa-1, Mitofusin 1, Mitofusin 2, and Actin probing the same membrane as used in Figure 3E.  
22 Experiment performed in 786-O pTRIPZ shControl and shACSS2 cells treated with doxycycline  
23 for 24 hours.

1 **Supplemental Figure 6. A.** Representative images of crystal violet staining from a dose-  
2 response time-course treatment with DMSO or ACSS2 inhibitor in epithelial cells isolated from  
3 ccRCC patient's normal adjacent tissue. **B.** Representative images of crystal violet staining  
4 from a dose-response time-course treatment with DMSO or ACSS2 inhibitor in epithelial cells  
5 isolated from ccRCC patient tumor sections. **C.** Representative images of crystal violet staining  
6 from a dose-response time-course treatment with DMSO or ACSS2 inhibitor in epithelial cells  
7 isolated from ccRCC patient's normal adjacent tissue. **D.** Representative images of crystal violet  
8 staining from a dose-response time-course treatment with DMSO or ACSS2 inhibitor in  
9 epithelial cells isolated from ccRCC patient tumor sections. **E.** Bar graph showing average fold  
10 change values for gene expression of *HK2* and *EPAS1* extracted from Nanostring experiment  
11 performed in ccRCC patient tumor samples treated with DMSO (n=3) or 5  $\mu$ M ACSS2i (n=3) for  
12 48 hours. Statistical significance determined by performing unpaired, two-tailed t-tests (\*\*, P-  
13 value < 0.001). **F.** Bar graph showing average fold change values for gene expression of genes  
14 involved in the cholesterol biosynthesis pathway extracted from Nanostring experiment  
15 performed in ccRCC patient tumor samples treated with DMSO (n=3) or 5  $\mu$ M ACSS2i (n=3) for  
16 48 hours. Statistical significance determined by performing multiple unpaired, two-tailed t-tests  
17 (\*\*, P-value < 0.01; \*\*\*, P-value < 0.001; \*\*\*\*, P-value < 0.0001). **G.** Model of mechanism.

18

Figure 1. ACSS2 is essential for ccRCC growth and proliferation

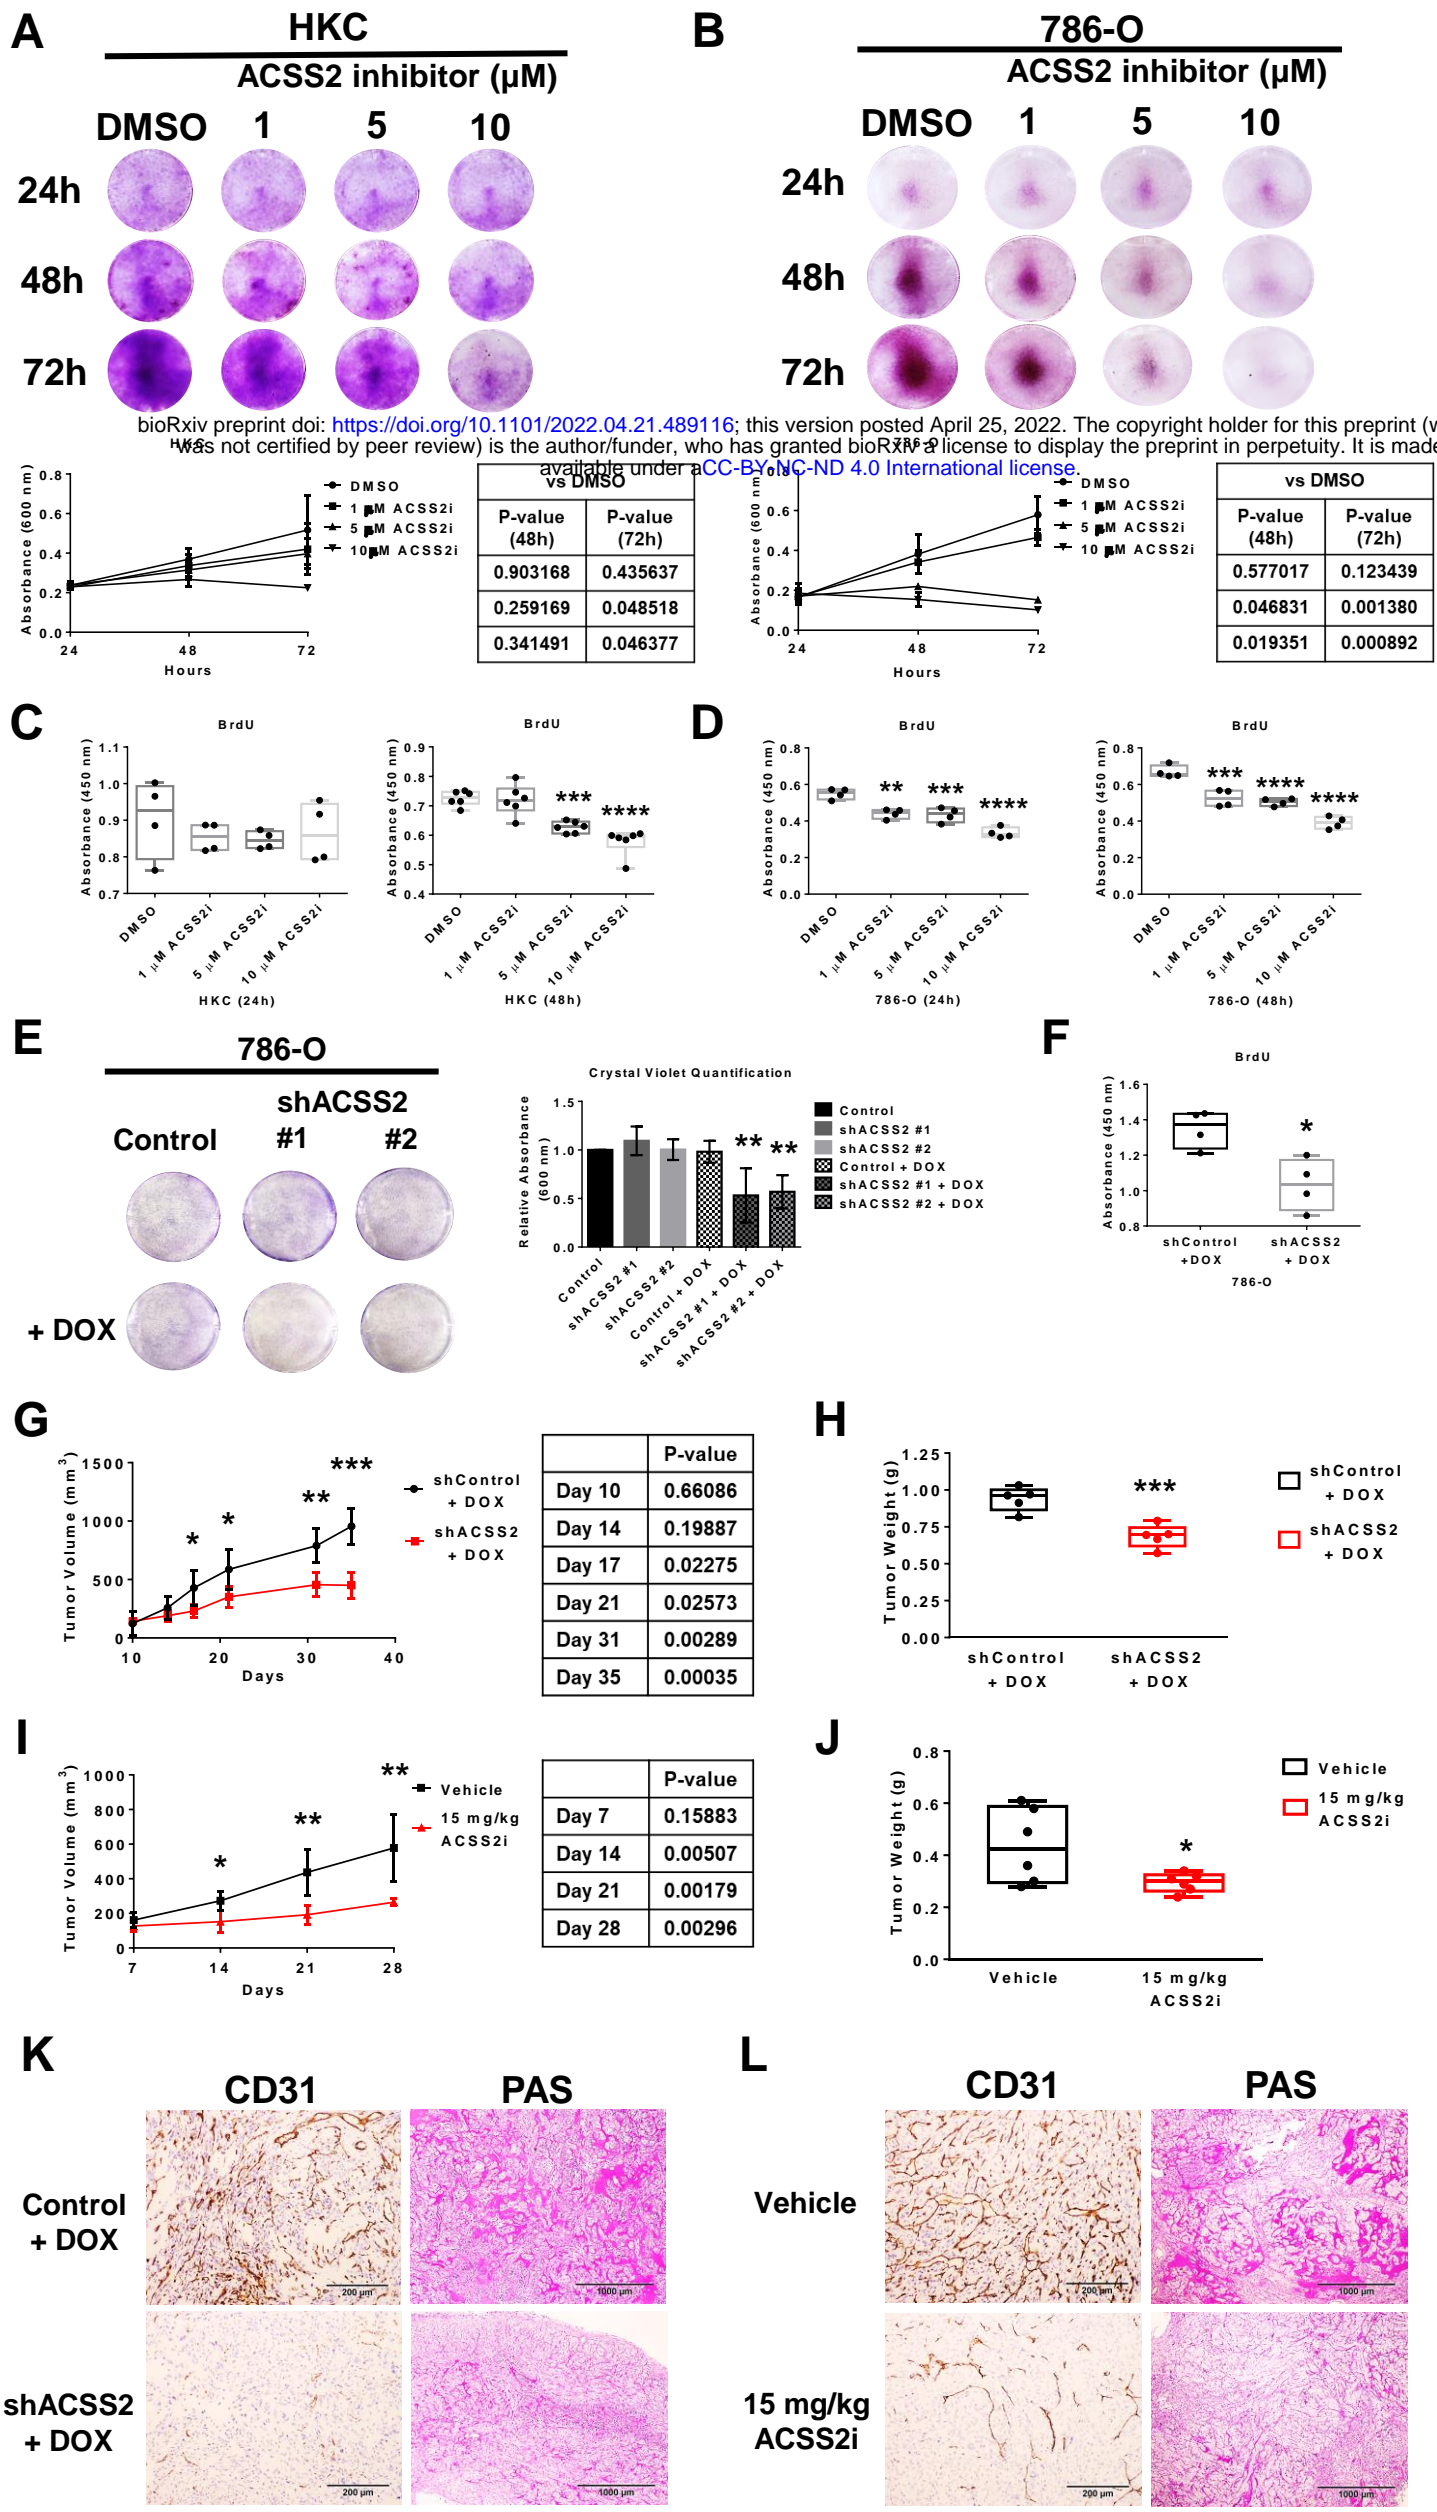

A

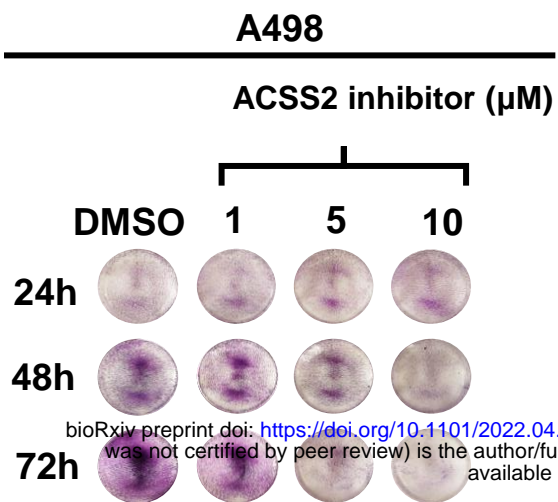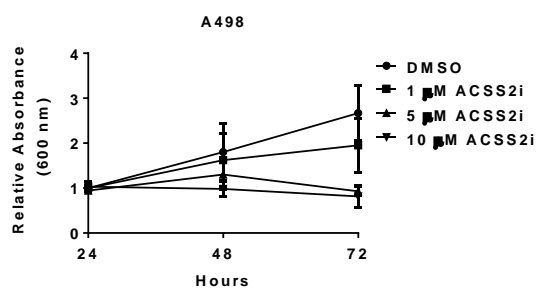

| vs DMSO       |               |
|---------------|---------------|
| P-value (48h) | P-value (72h) |
| 0.738048      | 0.223531      |
| 0.098731      | 0.008546      |
| 0.008546      | 0.008329      |

B

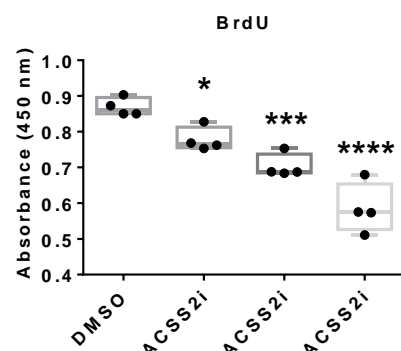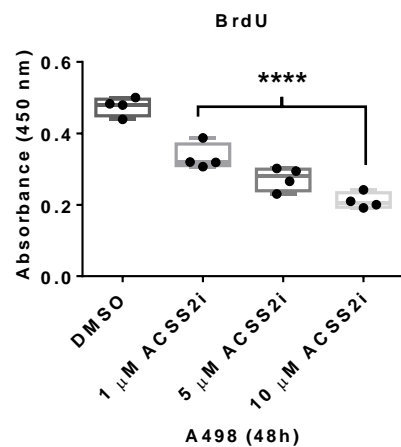

C

**Tumor Spheres - 786-O**  
Day 7

DMSO

5  $\mu\text{M}$  ACSS2i

10X

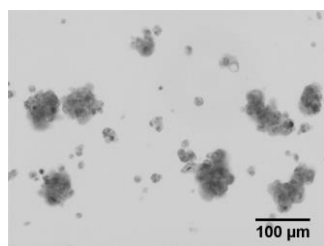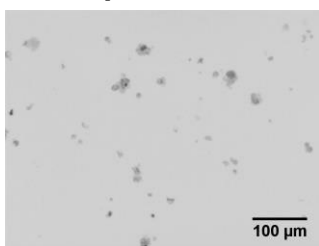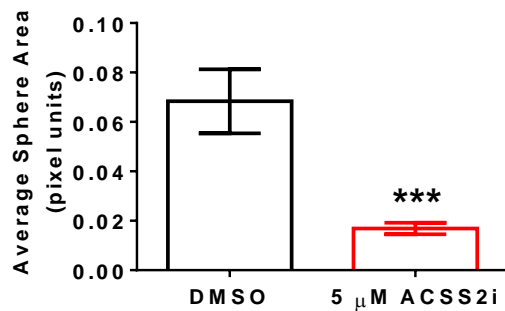

D

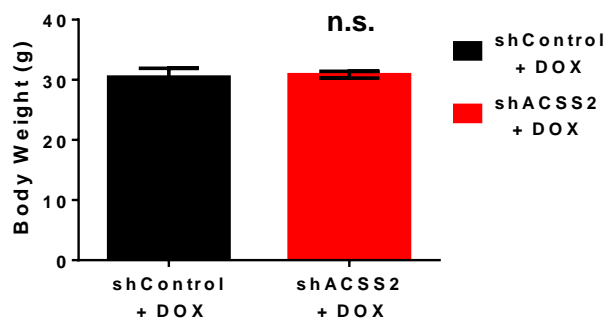

E

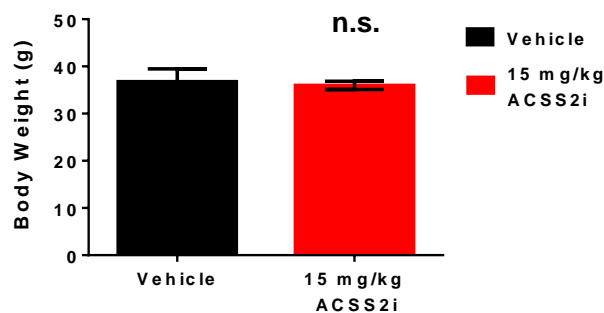

F

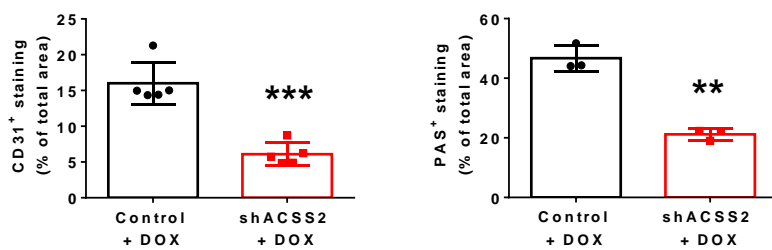

G

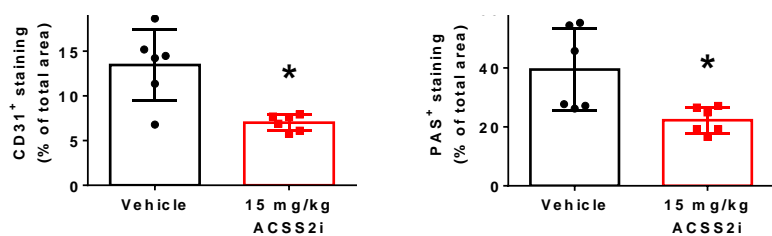

**Figure 2. HIF-2 $\alpha$  gene and protein expression is regulated by ACS2 activity.**

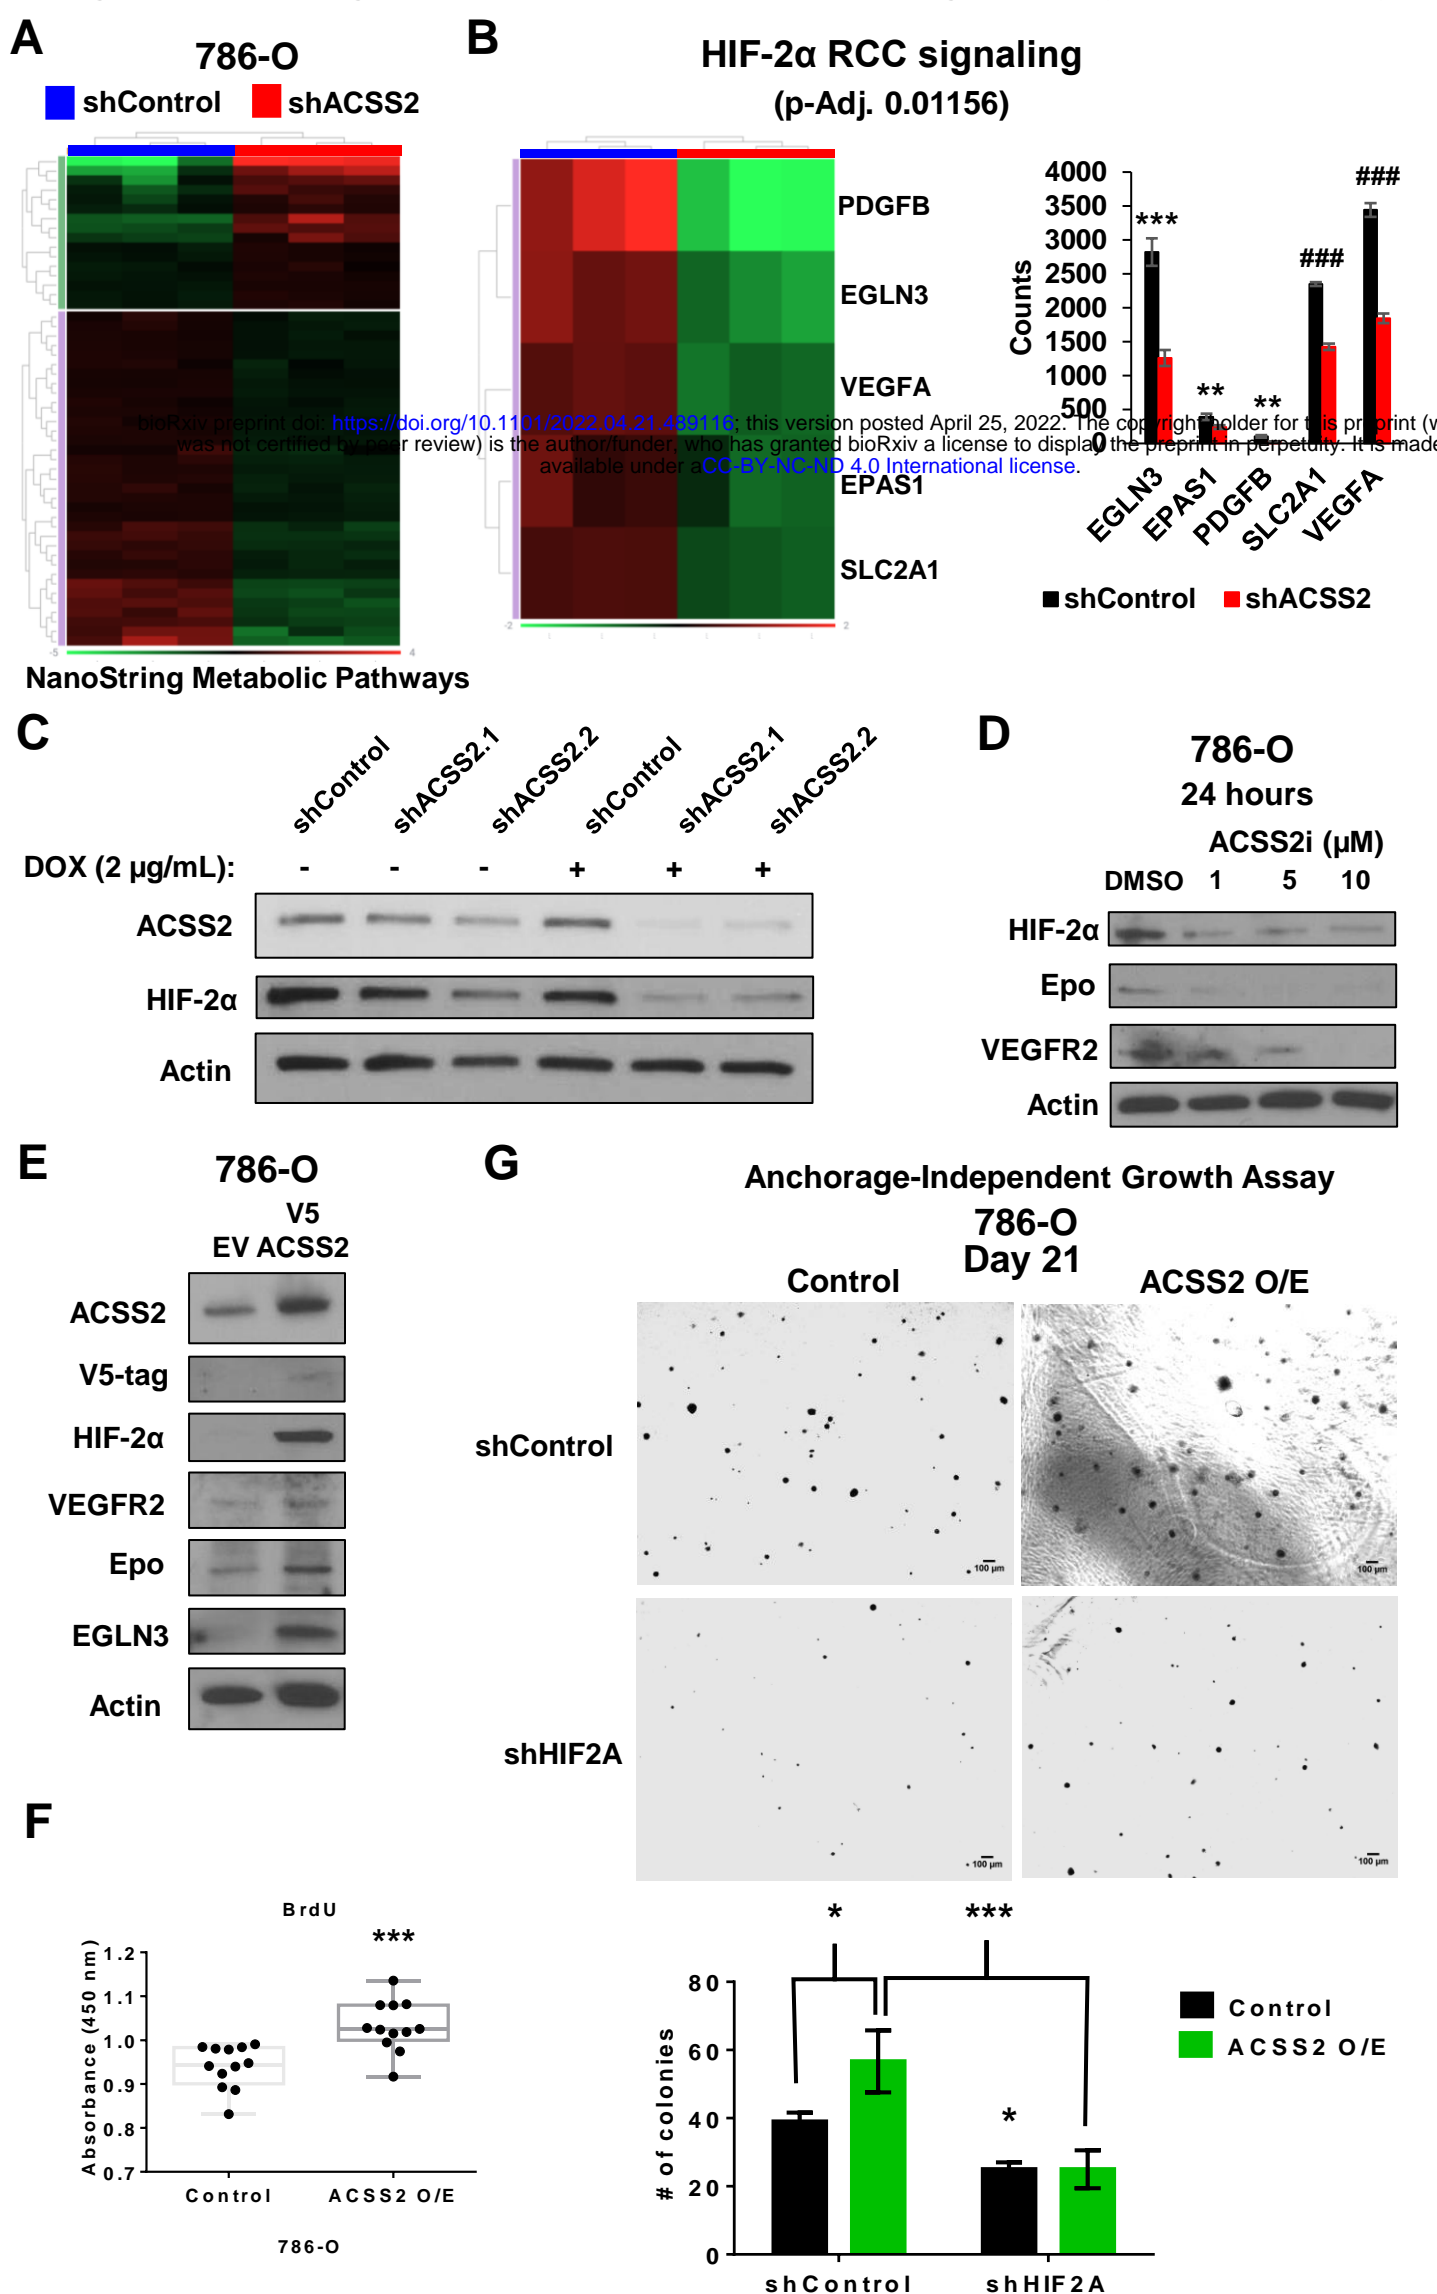



**A**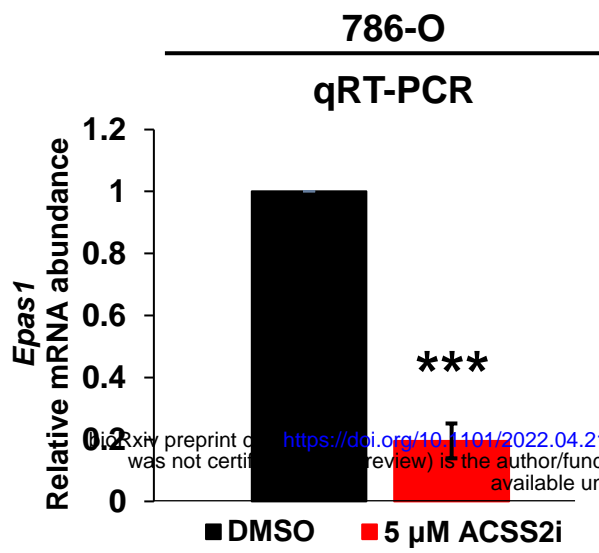**B**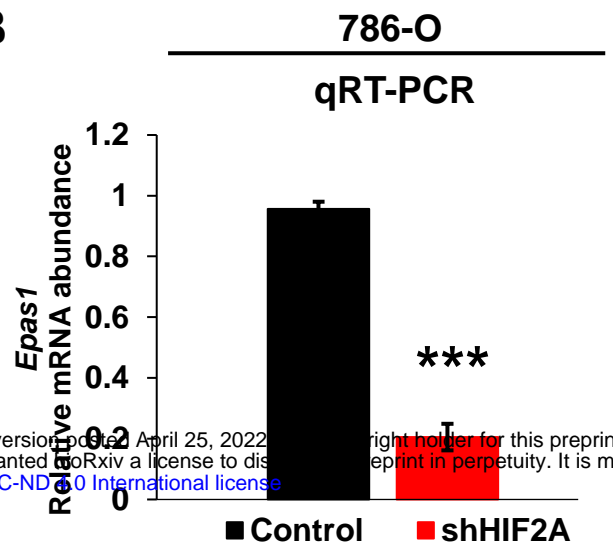**C**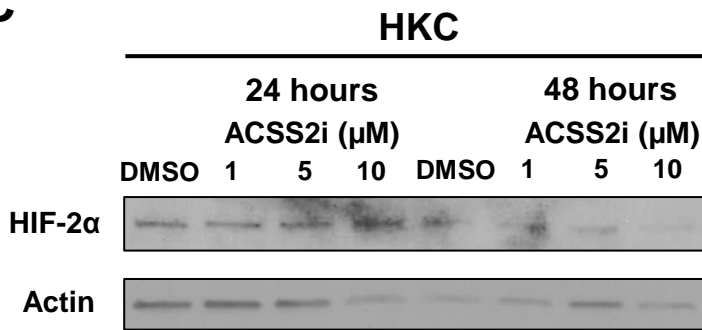**D**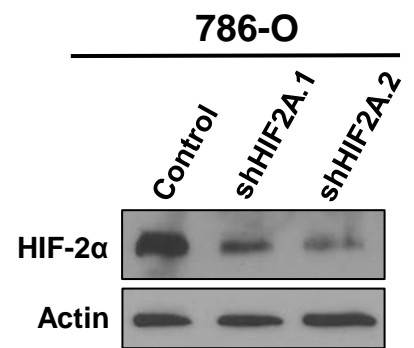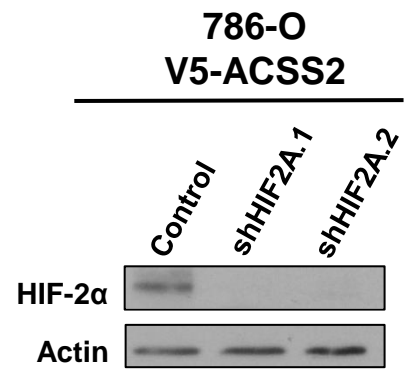

**Figure 3. ACSS2 activity mediates HIF-2 $\alpha$  stability.**

**A**

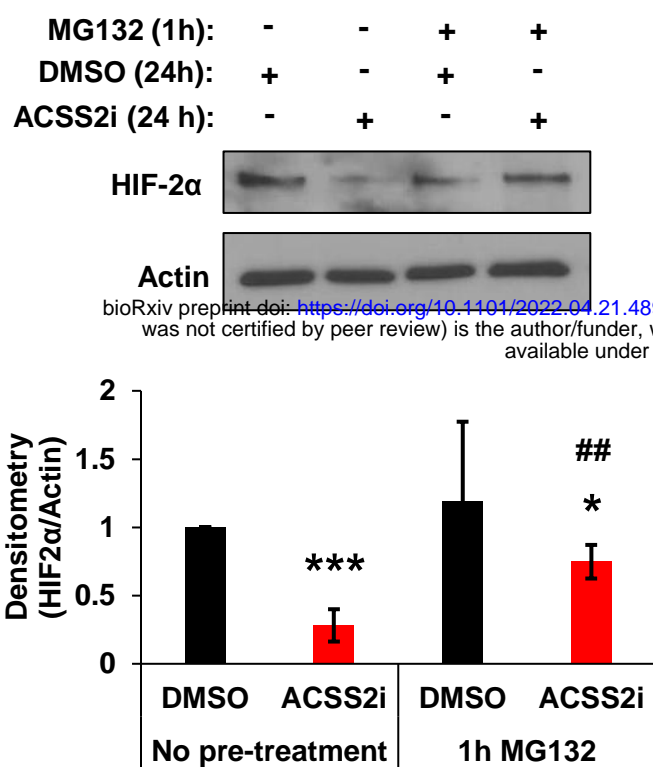

**B**

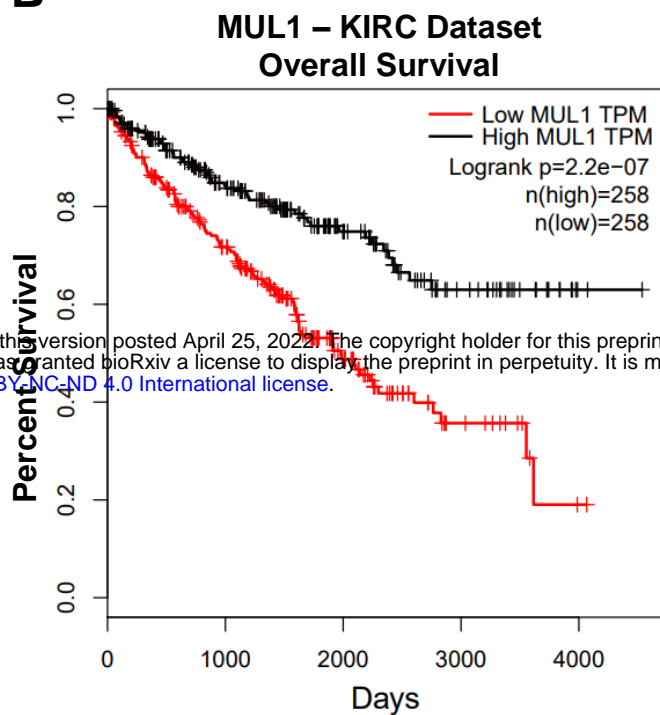

**C**

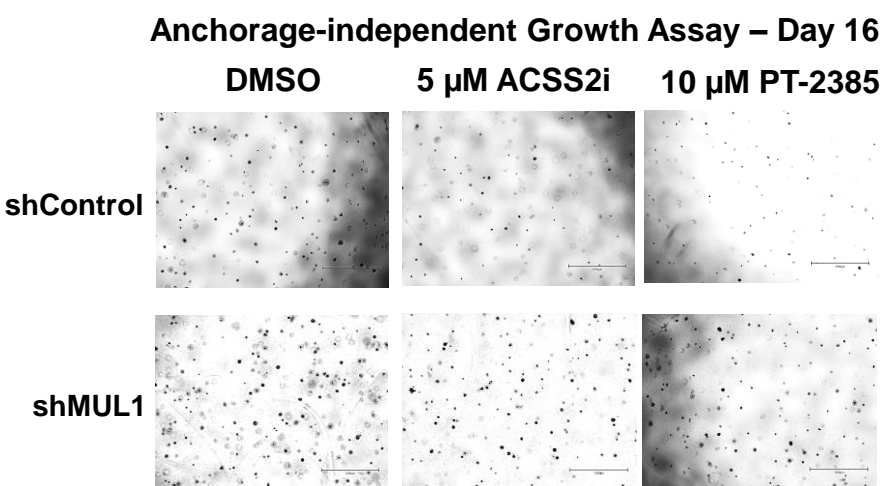

**D**

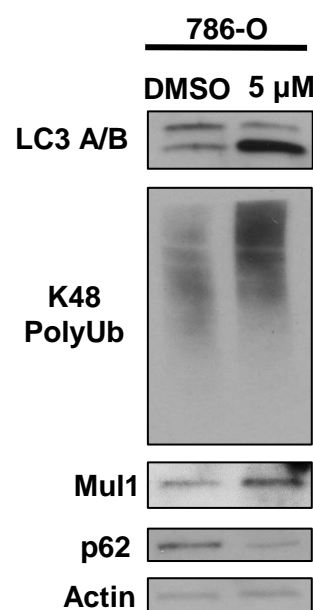

**E**

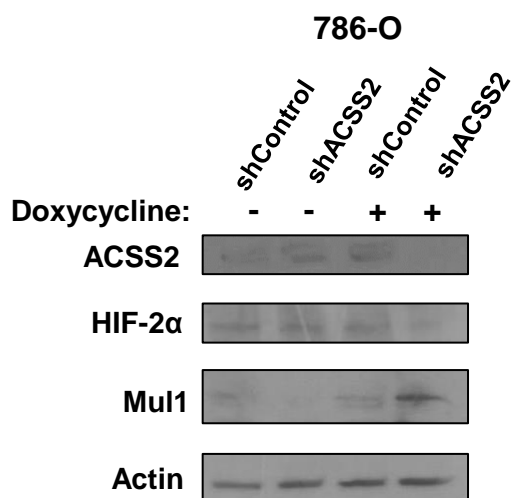

**F**

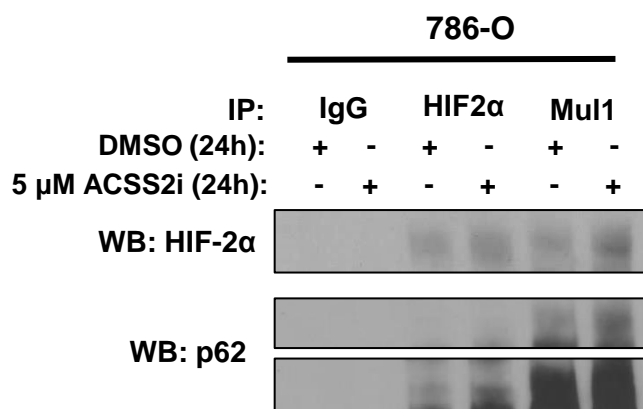

**A**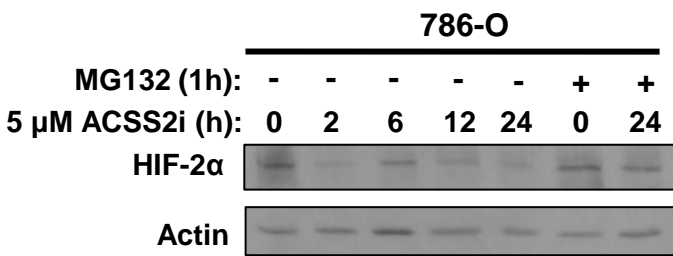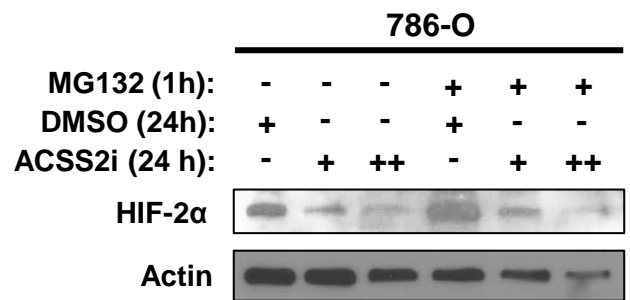**B**

MUL1 – KIRC Individual Cancer Stages

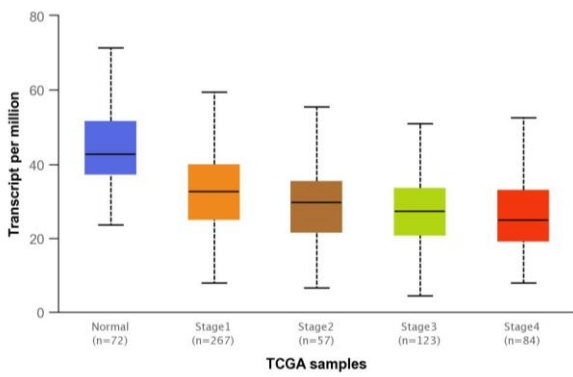

| Comparison        | Statistical Significance |
|-------------------|--------------------------|
| Normal-vs-Stage 1 | 5.4400928E-15            |
| Normal-vs-Stage 2 | 1.9221002E-10            |
| Normal-vs-Stage 3 | <1E-12                   |
| Normal-vs-Stage 4 | 4.4408920E-16            |

**C**

Protein expression of MUL1 in ccRCC

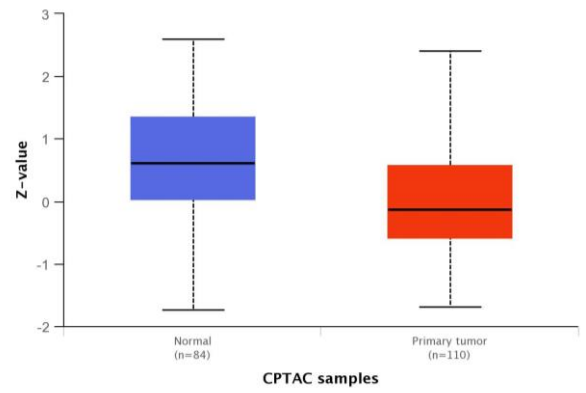

| Comparison        | Statistical Significance |
|-------------------|--------------------------|
| Normal-vs-Primary | 3.990813E-04             |

**D**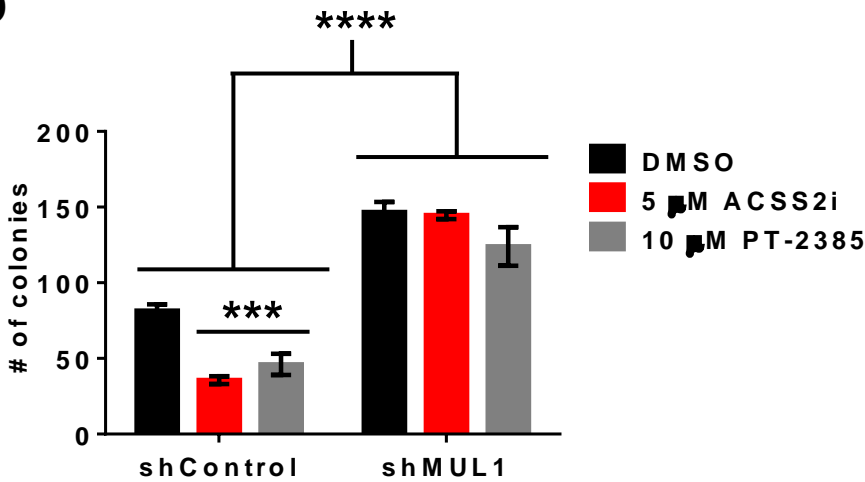**E**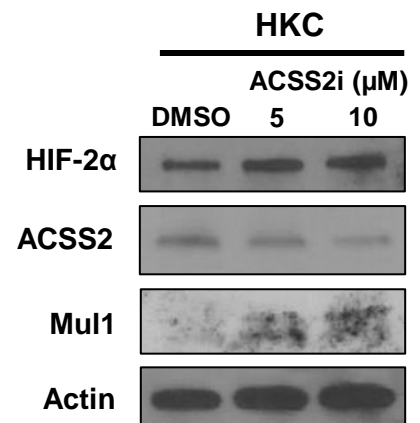



**Figure 4. ACSS2 activity supports glucose and cholesterol metabolism.**

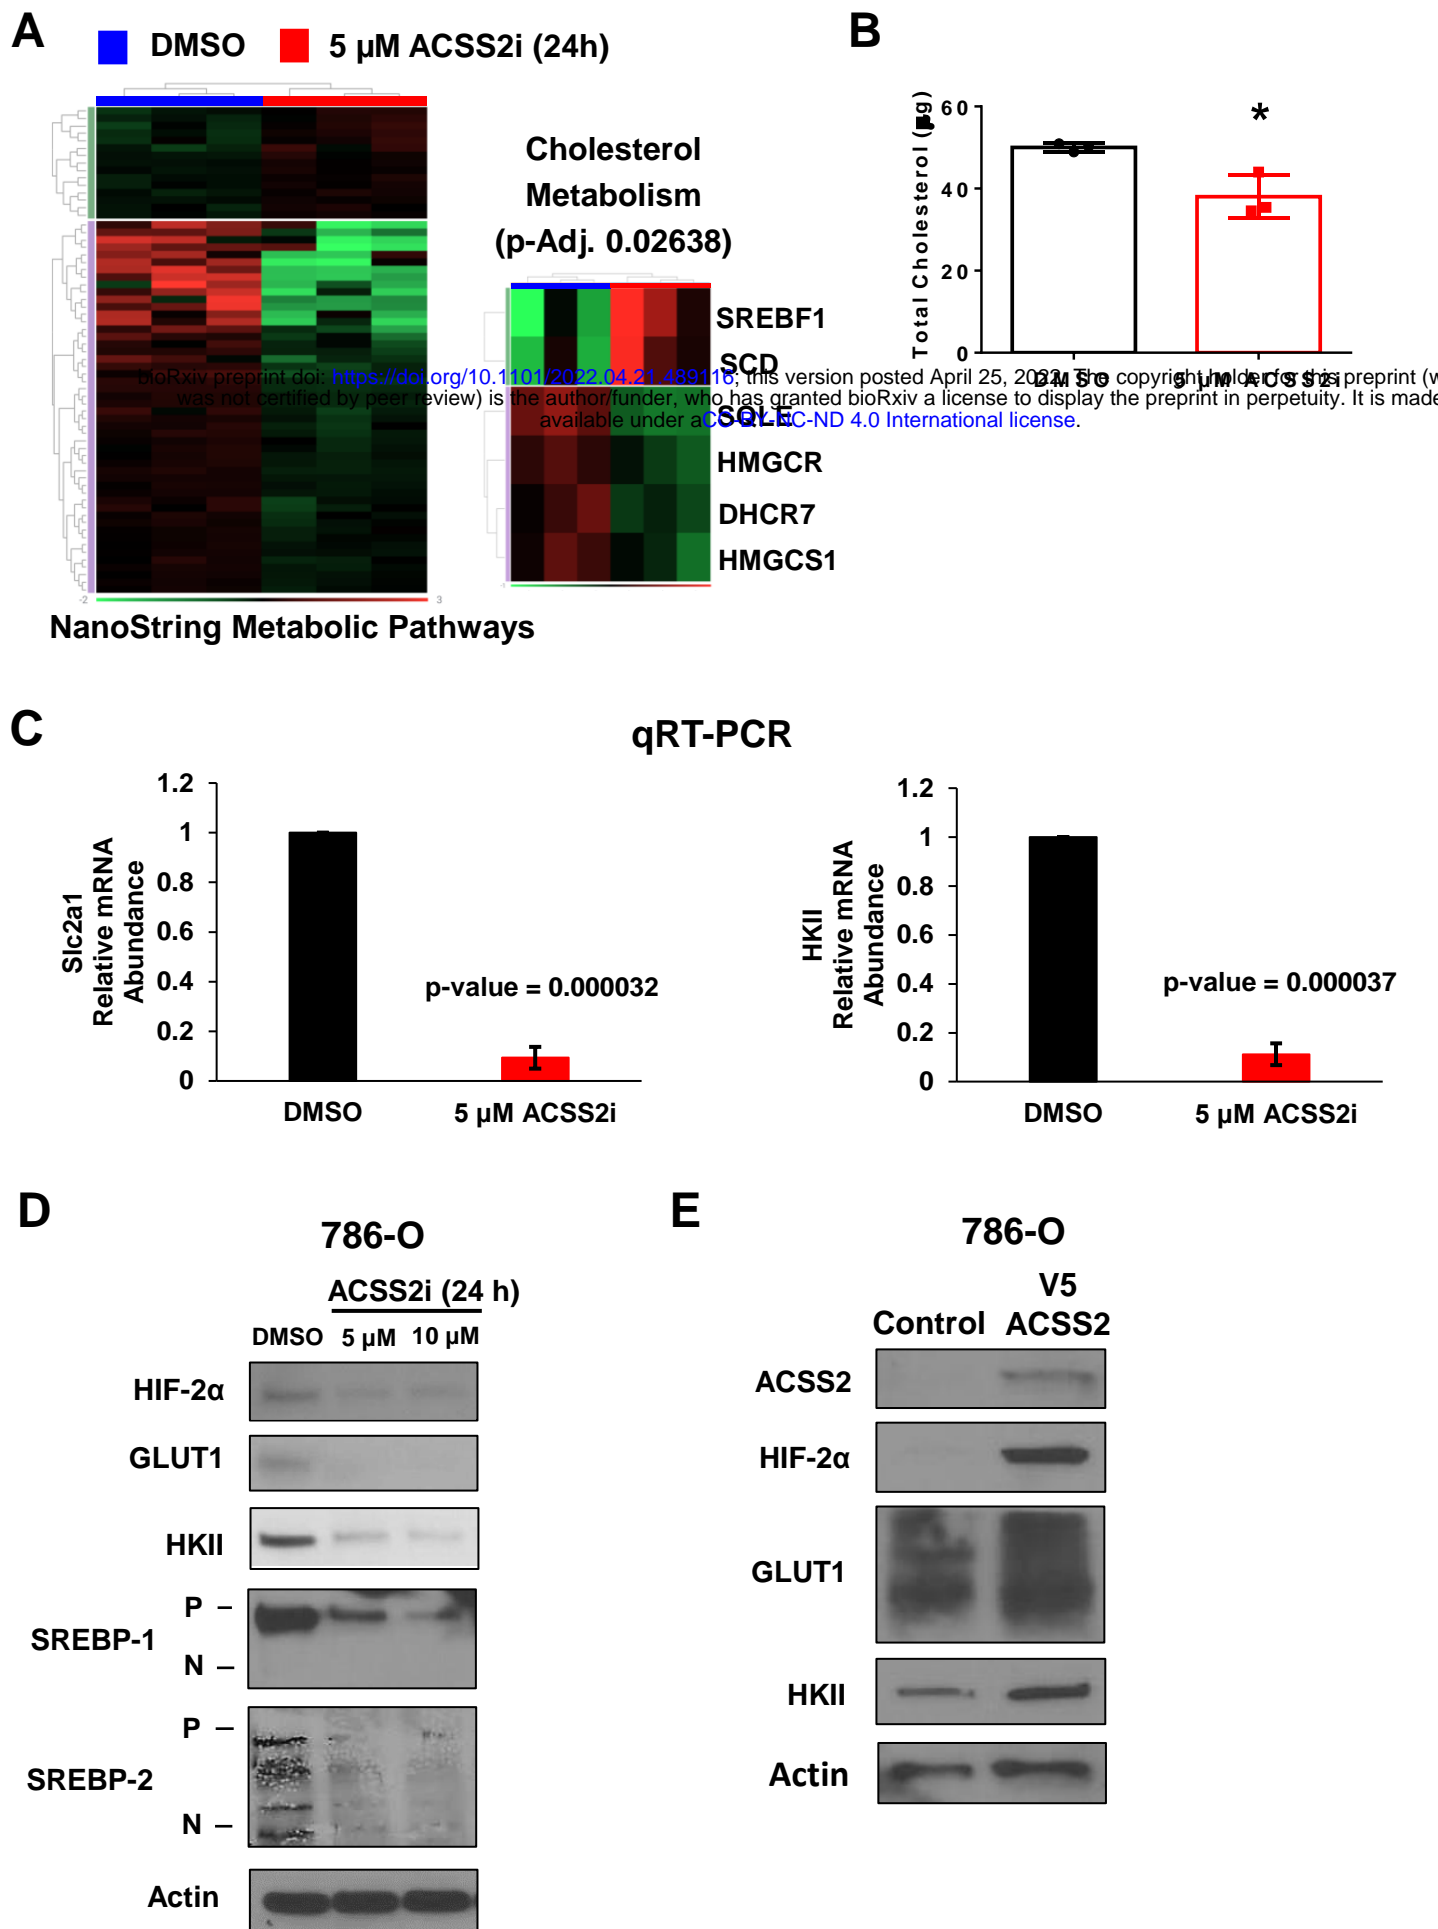

A

## Cholesterol Biosynthesis

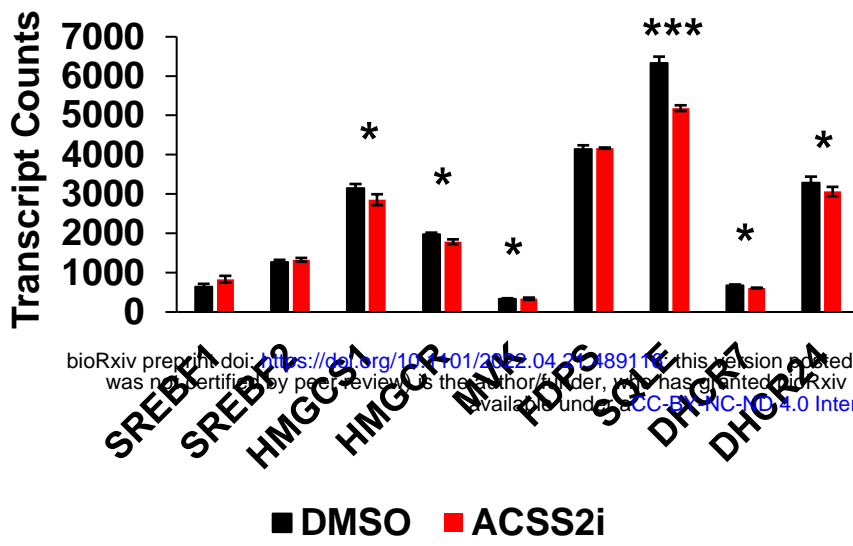

B

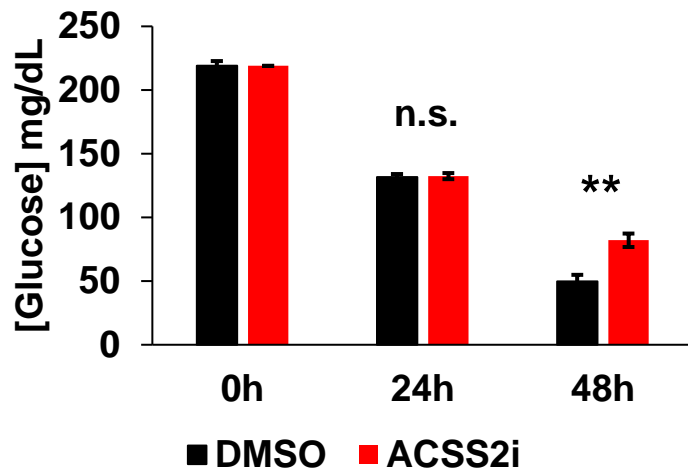

C

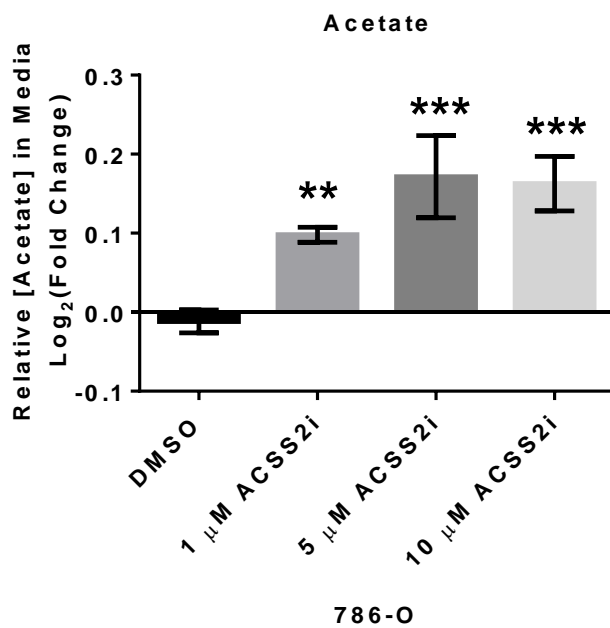

D

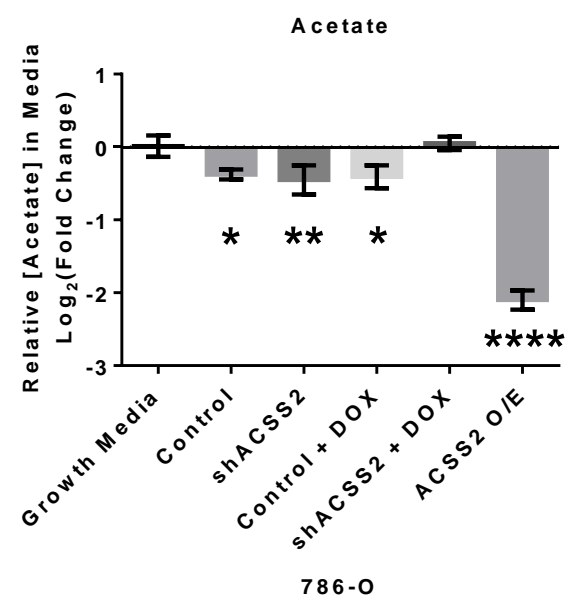

**Figure 5. Targeting ACSS2 elicits cancer cell-specific mitochondrial defects.**

**A**

**HKC**  
**DMSO – 72 hours**

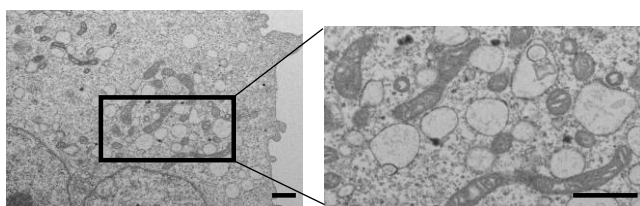

**B**

**786-O**  
**DMSO – 72 hours**

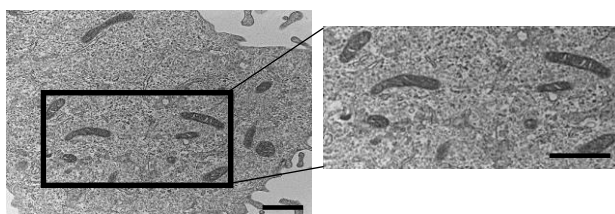

bioRxiv preprint doi: <https://doi.org/10.1101/2022.04.21.489116>; this version posted April 15, 2022. The copyright holder for this preprint (which was not certified by peer review) is the author/funder, who has granted bioRxiv a license to display the preprint in perpetuity. It is made available under aCC-BY-NC-ND 4.0 International license.

**5  $\mu$ M ACSS2i – 24 hours**

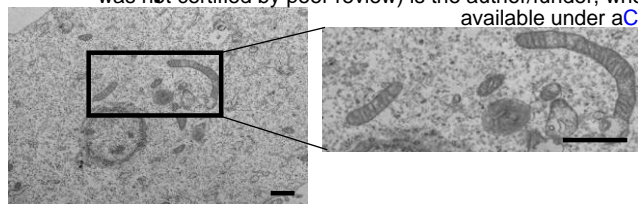

**5  $\mu$ M ACSS2i – 24 hours**

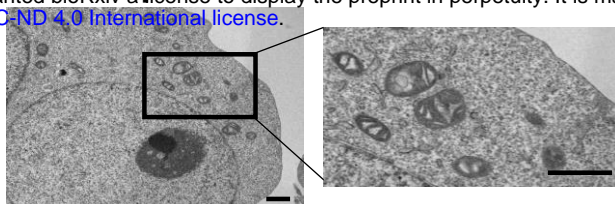

**5  $\mu$ M ACSS2i – 48 hours**

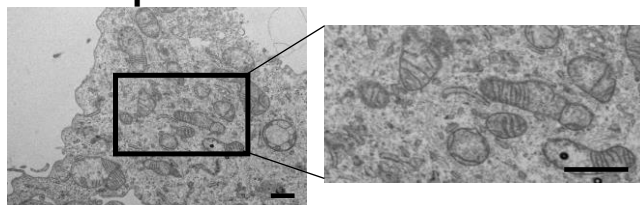

**5  $\mu$ M ACSS2i – 48 hours**

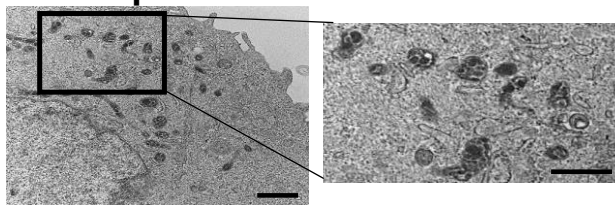

**5  $\mu$ M ACSS2i – 72 hours**

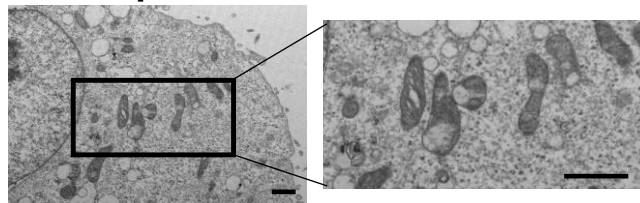

**5  $\mu$ M ACSS2i – 72 hours**

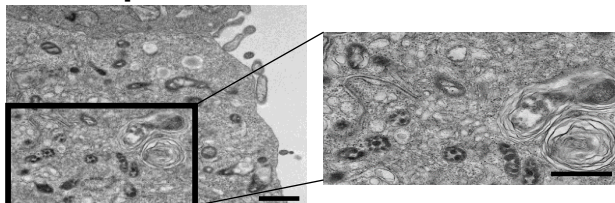

**C**

**786-O**  
**shControl + DOX**

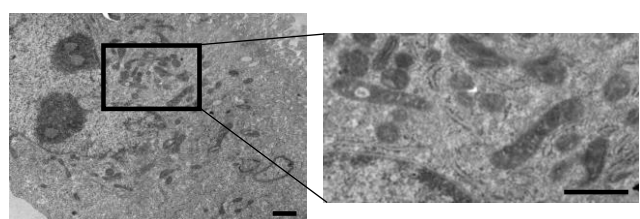

**786-O**  
**shACSS2 + DOX**

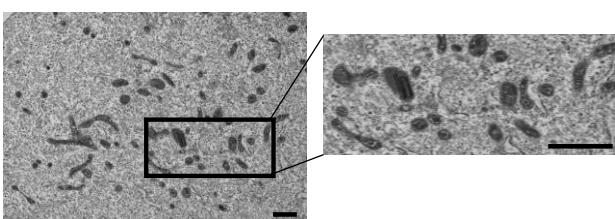

**D**

**786-O**  
**ACSS2 o/e**

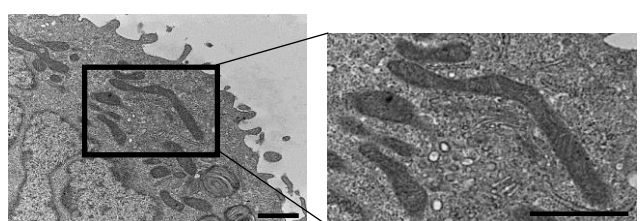

**786-O**  
**ACSS2 o/e + shHIF2A**

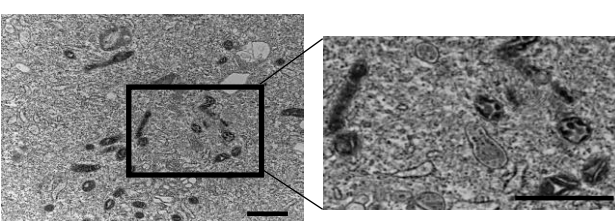

**E**

**786-O**  
**10  $\mu$ M PT2385 – 72 hours**

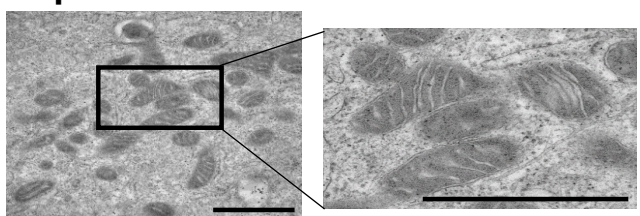

**A**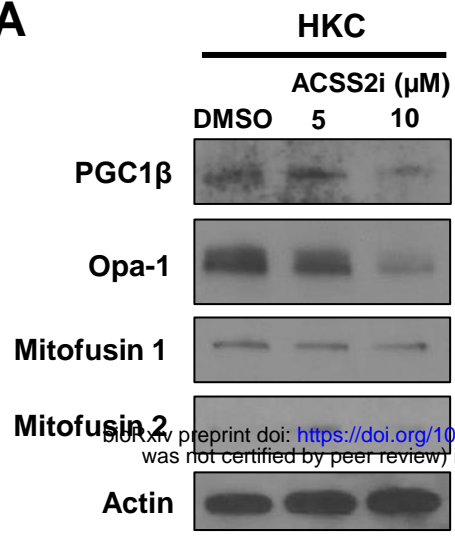**B**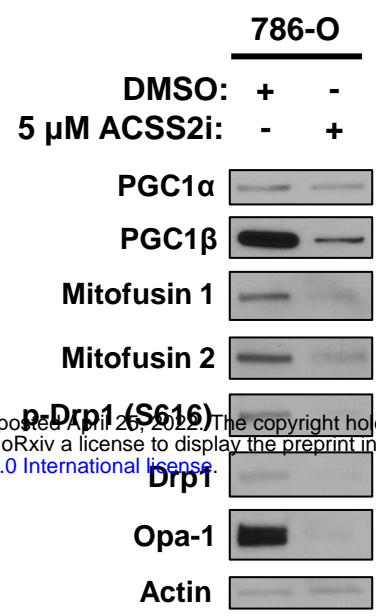**C**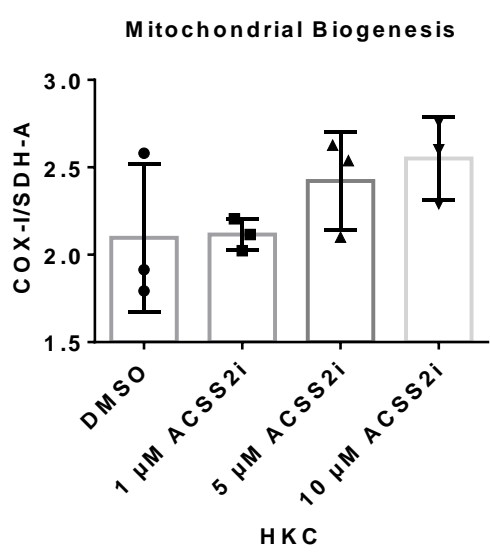**D**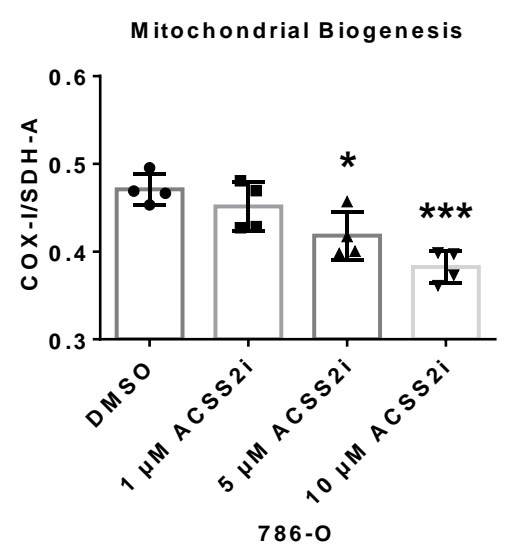**E**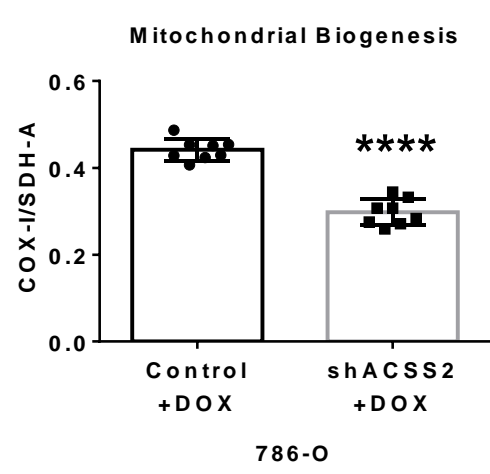**F**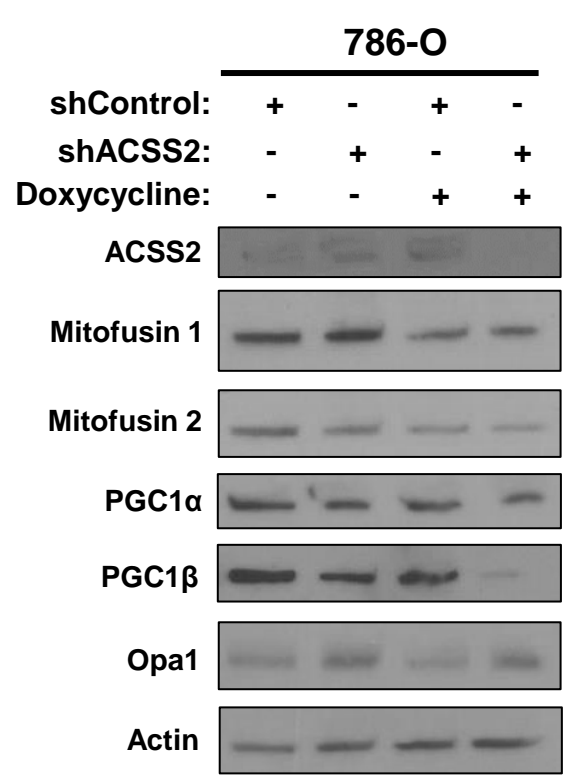



**Figure 6. ACSS2 inhibition selectively impedes cancer cell growth and HIF-2 $\alpha$  expression in ccRCC patient samples.**

**A**

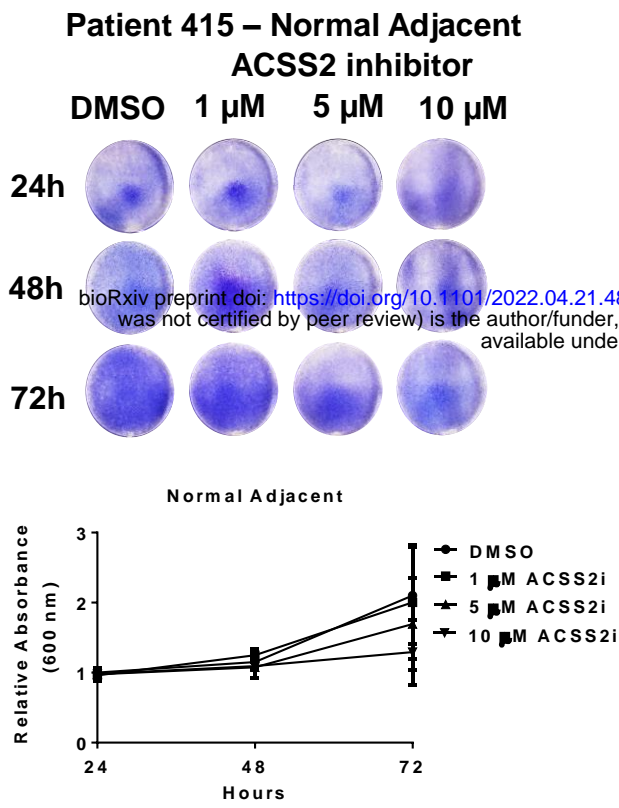

**B**

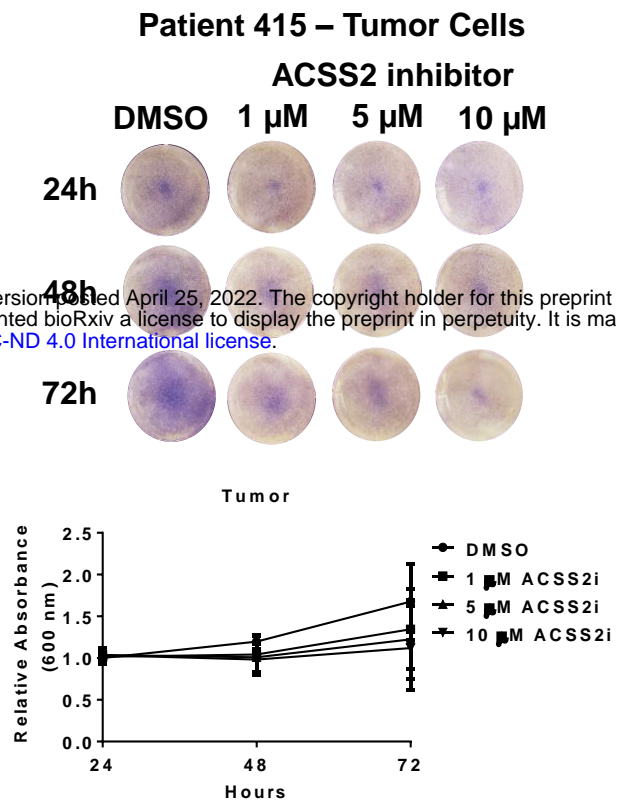

**C**

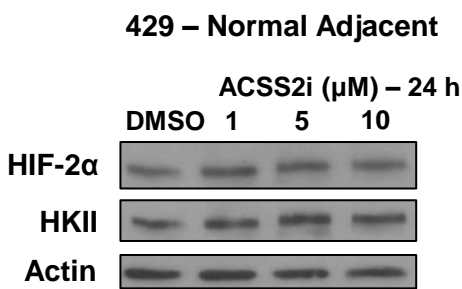

**D**

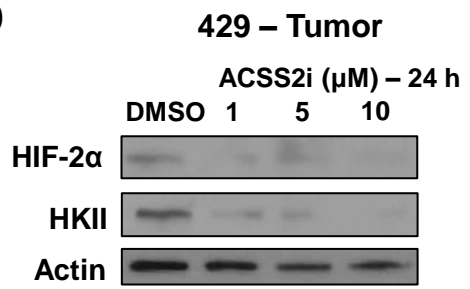

**E**

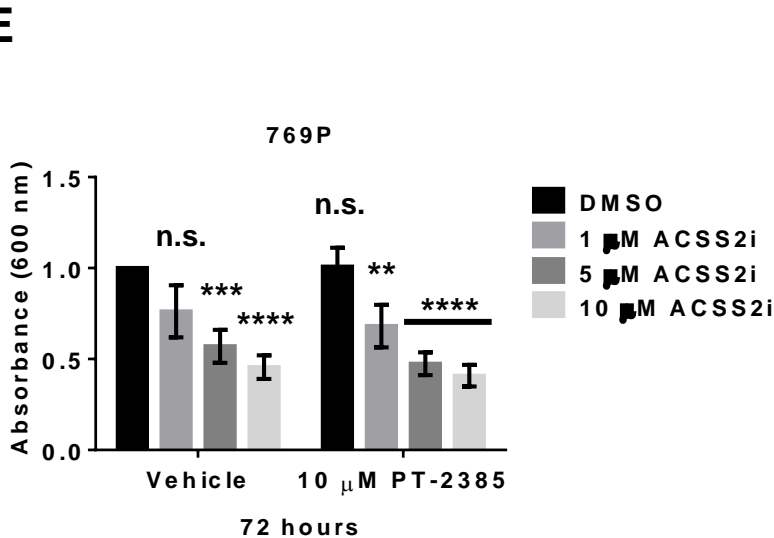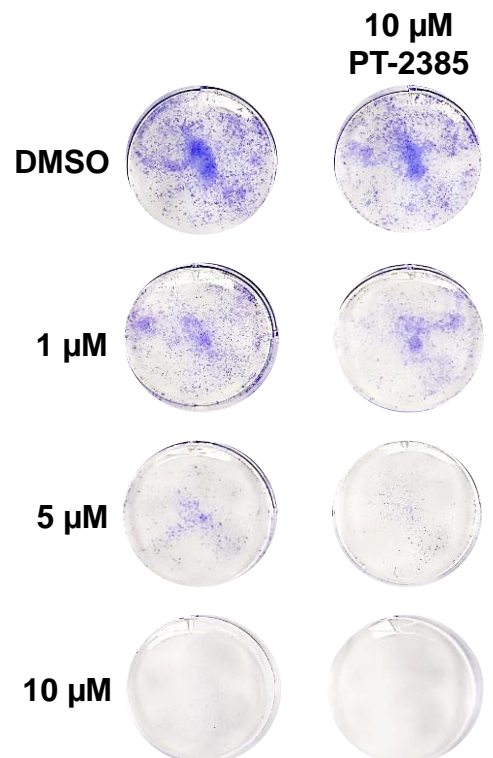

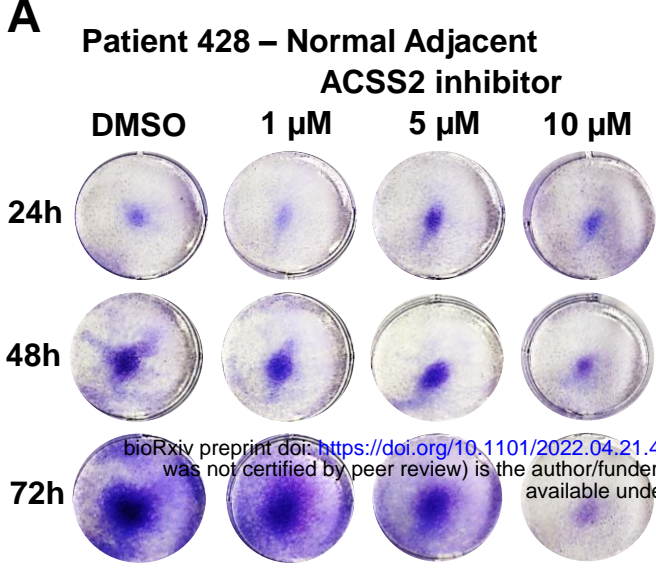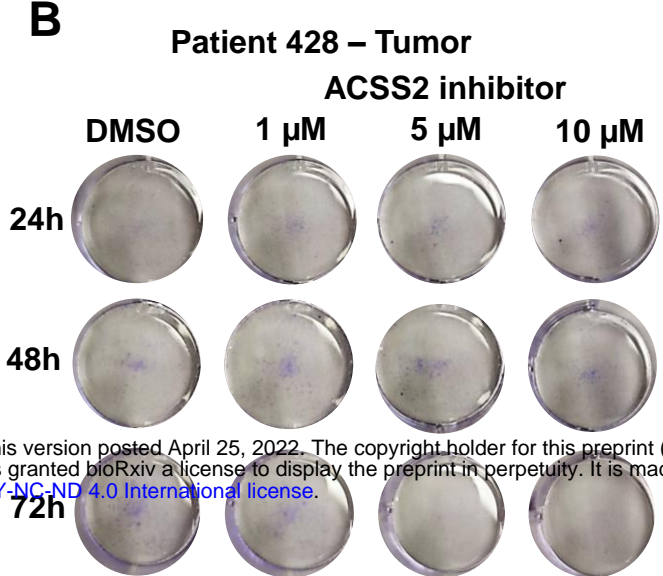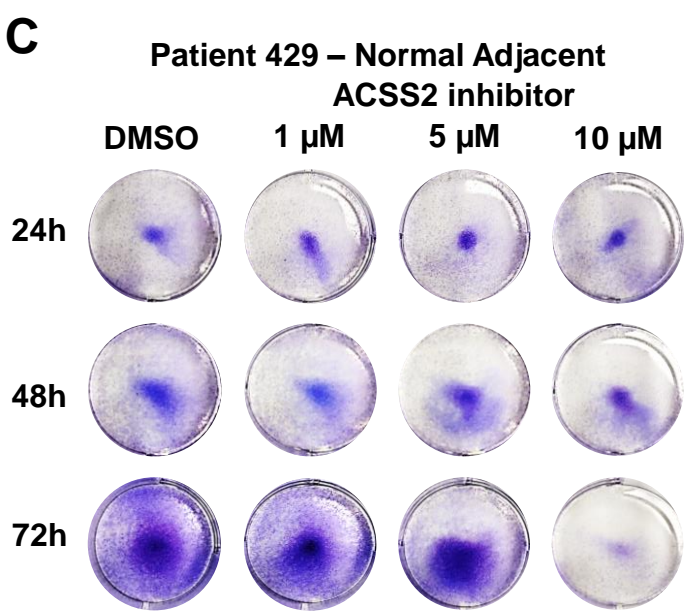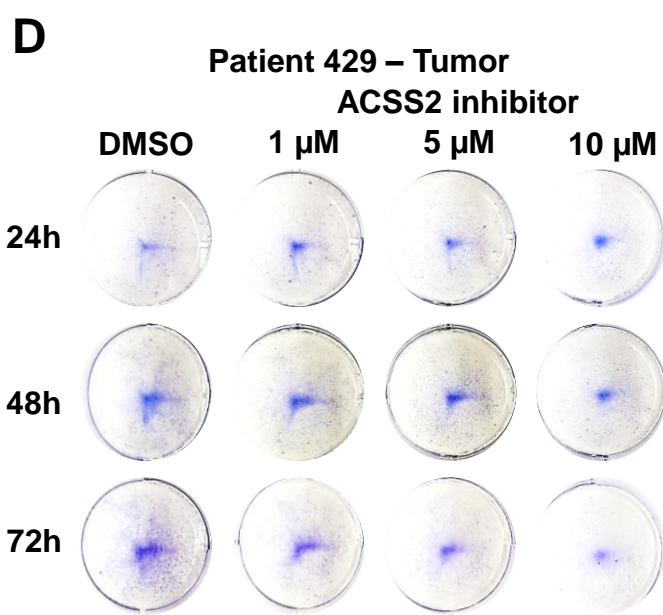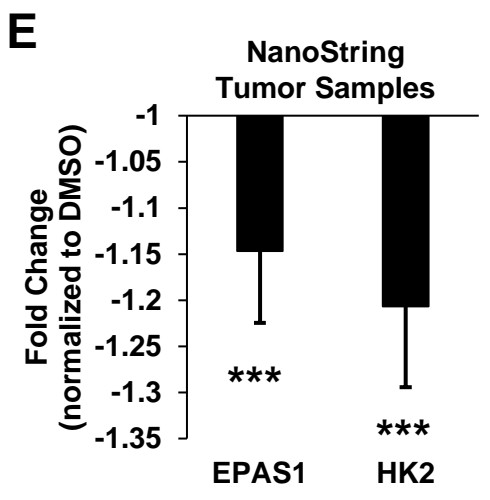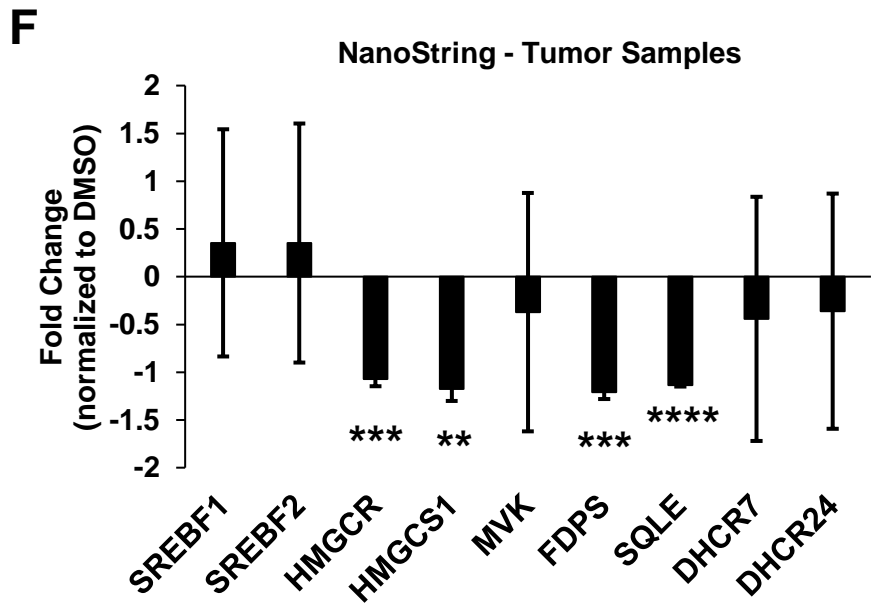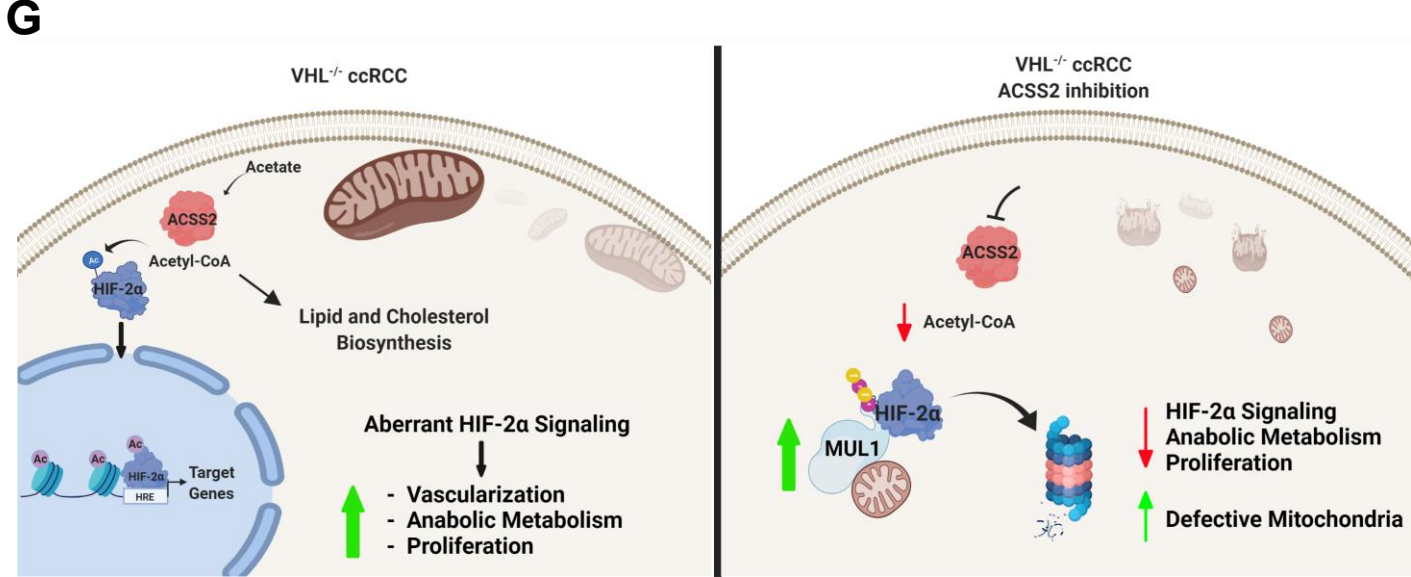

Supplemental Figure 6
